# Effective high-throughput RT-qPCR screening for SARS-CoV-2 infections in children

Felix Dewald<sup>1,2\*</sup>, Isabelle Suárez<sup>2,3,4\*</sup>, Ronja Johnen<sup>5</sup>, Jan Grossbach<sup>5</sup>, Roberto Moran-Tovar<sup>6</sup>, Gertrud Steger<sup>1</sup>, Alexander Joachim<sup>7</sup>, Gibran Horemheb Rubio<sup>1</sup>, Mira Fries<sup>3,8</sup>, Florian Behr<sup>3,8</sup>, Joao Kley<sup>3</sup>, Andreas Lingnau<sup>9</sup>, Alina Kretschmer<sup>3</sup>, Carina Gude<sup>5</sup>, Guadalupe Beazes-Flores<sup>10</sup>, David Laveaga del Valle<sup>10</sup>, Alberto Roblero-Hernandez<sup>10</sup>, Jesus Magana-Cerino<sup>10</sup>, Adriana Torres Hernandez<sup>11</sup>, Jesus Ruiz-Quinones<sup>10</sup>, Konstantin Schega<sup>8</sup>, Viktoria Linne<sup>3</sup>, Lena Junker<sup>3</sup>, Marie Wunsch<sup>1</sup>, Eva Heger<sup>1</sup>, Elena Knops<sup>1</sup>, Veronica Di Cristanziano<sup>1</sup>, Meike Meyer<sup>7</sup>, Christoph Hünseler<sup>7</sup>, Lutz T. Weber<sup>7</sup>, Jan-Christoffer Lüers<sup>12</sup>, Gustav Quade<sup>13</sup>, Hilmar Wisplinghoff<sup>14</sup>, Carsten Tiemann<sup>15</sup>, Rainer Zotz<sup>16</sup>, Hassan Jomaa<sup>17</sup>, Arthur Pranada<sup>18</sup>, Ileana Herzum<sup>19</sup>, Paul Cullen<sup>20</sup>, Franz-Josef Schmitz<sup>21</sup>, Paul Philippsen<sup>22</sup>, Georg Kirchner<sup>23</sup>, Cornelius Knabbe<sup>24</sup>, Martin Hellmich<sup>25</sup>, Michael Buess<sup>8</sup>, Anna Wolff<sup>8</sup>, Annelene Kossow<sup>8,26</sup>, Johannes Niessen<sup>8</sup>, Sebastian Jeworutzki<sup>27</sup>, Jörg-Peter Schräpler<sup>27</sup>, Michael Lässig<sup>6</sup>, Jörg Dötsch<sup>7</sup>, Gerd Fätkenheuer<sup>2,3</sup>, Rolf Kaiser<sup>1</sup>, Andreas Beyer<sup>5\*</sup>, Jan Rybniker<sup>2,3,4\*</sup>, Florian Klein<sup>1,2,4\*</sup>

## Affiliations

1. Institute of Virology, Faculty of Medicine, University Hospital Cologne, University of Cologne, Cologne, Germany
2. Center for Molecular Medicine Cologne, University of Cologne, Cologne, Germany.
3. Department I of Internal Medicine, Division of Infectious Diseases, Faculty of Medicine, University Hospital Cologne, University of Cologne, Cologne
4. German Center for Infection Research, Partner Site Bonn-Cologne, Cologne, Germany
5. CECAD Research center, University of Cologne, Cologne, Germany
6. Institute for Biological Physics, University of Cologne, Cologne, Germany
7. Department of Pediatrics, Faculty of Medicine, University Hospital Cologne, University of Cologne, Cologne, Germany
8. Health department of Cologne, Cologne, Germany
9. Ministry of Schools and Education of North Rhine-Westphalia, Düsseldorf, Germany
10. Centro de Investigación en Enfermedades Tropicales y Emergentes, Hospital Regional de Alta Especialidad, Dr. Juan Graham Casasús, Villahermosa, Mexico
11. Biocililab SA de CV, Villahermosa, Mexico
12. Department of Otorhinolaryngology, Head and Neck Surgery, Faculty of Medicine, University Hospital Cologne, University of Cologne, Cologne
13. MVZ Labor Dr. Quade & Kollegen GmbH, Cologne, Germany

14. Labor Dr. Wisplinghoff, Cologne, Germany
15. Labor Krone, Bad Salzuflen, Germany
16. Labor ZotzKlimas, Düsseldorf, Germany
17. Synlab, Leverkusen, Germany
18. Medizinisches Versorgungszentrum Dr. Eberhard & Partner, Dortmund, Germany
19. Medizinische Laboratorien Düsseldorf, Düsseldorf, Germany
20. MVZ Labor Münster, Münster, Germany
21. Mühlenkreiskliniken, Minden, Germany
22. Labor Mönchengladbach MVZ Dr. Stein und Kollegen, Mönchengladbach, Germany
23. Eurofins Laborbetriebsgesellschaft Gelsenkirchen GmbH & Eurofins MVZ Medizinisches Labor Gelsenkirchen GmbH, Gelsenkirchen, Germany
24. Heart- and Diabetes Center NRW, Medical Faculty, Ruhr-University Bochum, Institute for Laboratory and Transfusion Medicine, Bochum, Germany
25. Institute of Medical Statistics and Computational Biology, Faculty of Medicine, University Hospital Cologne, University of Cologne, Cologne
26. Institute for Hygiene, University Hospital Münster, Münster, Germany
27. Faculty of Social Science, Ruhr-University Bochum, Bochum, Germany

\* contributed equally to this manuscript

## 1 **Abstract**

2 Systematic SARS-CoV-2 testing is a valuable tool for infection control and surveillance.  
3 However, broad application of high sensitive RT-qPCR testing in children is often  
4 hampered due to unpleasant sample collection, limited RT-qPCR capacities and high  
5 costs. Here, we developed a high-throughput approach ('Lolli-Method') for SARS-CoV-  
6 2 detection in children, combining non-invasive sample collection with an RT-qPCR-  
7 pool testing strategy. SARS-CoV-2 infections were diagnosed with sensitivities of  
8 100% and 93.9% when viral loads were  $>10^6$  copies/ml and  $>10^3$  copies/ml in  
9 corresponding Naso-/Oropharyngeal-swabs, respectively. For effective application of  
10 the Lolli-Method in schools and daycare facilities, SEIR-modeling indicated a preferred  
11 frequency of two tests per week. The developed test strategy was implemented in  
12 3,700 schools and 698 daycare facilities in Germany, screening over 800,000  
13 individuals twice per week. In a period of 3 months, 6,364 pool-RT-qPCRs tested  
14 positive (0.64%), ranging from 0.05% to 2.61% per week. Notably, infections correlated  
15 with local SARS-CoV-2 incidences and with a school social deprivation index.  
16 Moreover, in comparison with the alpha variant, statistical modeling revealed a 36.8%  
17 increase for multiple ( $\geq 2$  children) infections per class following infections with the delta  
18 variant. We conclude that the Lolli-Method is a powerful tool for SARS-CoV-2  
19 surveillance and infection control in schools and daycare.

20

## 21 **Introduction**

22 The clinical course of COVID-19 in children is generally mild<sup>1,2</sup>. However, severe  
23 courses, deaths, and post-acute COVID-19 syndrome have been described and pose  
24 a risk to children when exposed to SARS-CoV-2<sup>3,4</sup>. Moreover, viral loads measured in  
25 infected children can be as high as those in adults<sup>5</sup>, which is consistent with the  
26 transmission of SARS-CoV-2 among children and from children to adults<sup>6</sup>. In order to

27 control SARS-CoV-2 infections, schools have been closed worldwide, resulting in the  
28 loss of approximately 50% of all school lessons in 2020<sup>7</sup>. However, while school  
29 closures can reduce SARS-CoV-2 transmissions when imbedded in a general lock-  
30 down strategy, the negative impact on the development and health of children is  
31 substantial and is manifested by e.g. higher rates of reduced emotional well-being,  
32 severe eating disorders, and overt psychiatric disease<sup>8-10</sup>.

33 Early detection of SARS-CoV-2 infections can contribute to infection control<sup>11</sup>.  
34 In addition, SARS-CoV-2 surveillance in schools allows to determine the efficiency of  
35 non-pharmaceutical interventions (NPIs)<sup>12</sup>. Therefore, several test strategies for  
36 schools and daycare facilities have been developed. In these, samples were mostly  
37 obtained by self-sampling using rapid antigen detection tests (RADTs) or RT-qPCR  
38 analyses<sup>13-16</sup>. However, various challenges remain including reduced sensitivity of  
39 RADTs<sup>17</sup>, acceptance of specimen collection by children<sup>18</sup>, and limited RT-qPCR  
40 capacities<sup>19</sup>. Despite the recent authorization for SARS-CoV-2 vaccines in children  
41 aged 5-11 years<sup>20</sup>, effective and sound test strategies remain critical to ensure infection  
42 control in open schools and daycare facilities. This is particularly important considering  
43 the dynamic situation of the SARS-CoV-2 pandemic in which new variants of concerns  
44 (VOCs) emerge and spread<sup>21</sup>. Here, we developed a non-invasive sampling approach  
45 combined with high-throughput pooled RT-qPCR testing (Lolli-Method) followed by the  
46 design of a test concept for schools and daycare facilities. This test concept was  
47 successfully implemented as a SARS-CoV-2 screening program for over 800,000  
48 children and demonstrated a precise monitoring and early detection of SARS-CoV-2  
49 infections.

50

51

52

## 53 **Results**

### 54 **Developing the Lolli-Method to screen for SARS-CoV-2 infections in children**

55 A widely applicable SARS-CoV-2 screening in children requires the combination of i.)  
56 an easy, safe and non-invasive sampling method with ii.) a resource-saving, reliable  
57 and scalable SARS-CoV-2 testing method. To meet these requirements, we developed  
58 the Lolli-Method by which a regular swab is used for self-sampling, i.e. to be sucked  
59 on for 30 seconds (Lolli-swab), combined with a pooled RT-qPCR analysis. In order to  
60 determine the sensitivity of this method, we investigated 254 acutely infected  
61 individuals in a side-by-side sampling approach using Nasopharyngeal-  
62 /Oropharyngeal (Np-/Op) versus Lolli-swab. Lolli-swabs were collected under  
63 supervision and all samples were analyzed by RT-qPCR (Fig. 1a, Supplementary Fig.  
64 1). By using the Lolli-Method, 95 out of 118 infected individuals were detected when  
65 sampled in the morning and 101 out of 153 when sampled during the day. Detected  
66 viral loads obtained by the Lolli-Method were lower (geometric mean  $2.22 \times 10^3$   
67 copies/ml) than viral loads measured in Np-/Op-swabs (geometric mean  $6.36 \times 10^4$   
68 copies/ml,  $p < 0.0001$ , Fig. 1b and 1c, Supplementary Data 1). However, while Lolli-  
69 swabs showed only 50% sensitivity in samples with corresponding viral loads of  $< 10^3$   
70 copies/ml, diagnostic sensitivities of 91.4% and 100% were reached for matched Np-  
71 /Op-swabs with viral loads of  $10^3$ - $10^6$  and  $> 10^6$  copies/ml, respectively (Figure 1d).  
72 Next, we determined the impact on the sensitivity by having food and liquid intake one  
73 hour before sampling (Fig. 1e, Supplementary Data 2), the use of different swab-types  
74 (Fig. 1f, Supplementary Data 3) and the dilution effect by the pooling-process (Fig. 1g,  
75 Supplementary Data 4). While different swab-types had no effect on sensitivity,  
76 breakfast one hour before sampling and pooling of up to 100 Lolli-swabs reduced the  
77 detected viral load by 2.2- and 3.3-fold, respectively. However, these differences did  
78 not result in a relevant reduction of overall sensitivity, detecting 56 out of 57 samples

79 despite breakfast or pooling. Finally, specificity of the Lolli-Method was found to be  
80 100%, testing 55 healthy individuals individually with Np-/Op-and Lolli-swabs  
81 (Supplementary Data 5).

82 We concluded that the Lolli-Method is an easy and non-invasive method that is  
83 highly sensitive in detecting infected individuals with viral loads above  $10^3$  copies/ml.

84

### 85 **High-throughput Lolli-Method screening concept in children**

86 Next, a screening concept for schools and daycare was developed. As part of this  
87 concept, Lolli-swabs of one class or group were obtained and pooled at sampling-site,  
88 followed by RT-qPCR analysis. To this end, each child of a class received a Lolli-swab,  
89 performed self-sampling and placed it in a common 50 ml tube (Fig. 1h). Very young  
90 children or children with disabilities received assistance by their parents or teachers.  
91 The pooled samples were tested by SARS-CoV-2 RT-qPCR. In case the pool was  
92 tested negative, all children were assumed to be SARS-CoV-2 negative. In case the  
93 pool was tested positive, children of the positive pool were re-tested individually in  
94 order to identify the infected individuals (Fig. 1h).

95 To determine an optimal test-frequency, the efficiency of a long-term SARS-  
96 CoV-2 screening was estimated using an SEIR-model (Fig. 1i and 1j, Supplementary  
97 Table 1). Simulations of 8-week-test-periods were carried out for fully-connected  
98 populations of 20 individuals, performing ensemble averages of over  $10^4$  runs.  
99 Simulations were performed for different basic reproduction values ( $R_0$ ) of SARS-CoV-  
100 2 and different scenarios of SARS-CoV-2 prevalence in the general population (0.01%  
101 and 0.1%). The total number of infected individuals, the number of infections due to  
102 transmissions within the test-population and the number of infections detected by the  
103 screening were calculated for different test-frequencies (0, 1, 2 or 3 times per week)  
104 with a turn-around time of 1 day and mandatory quarantine of 14 days for all 20

105 individuals (See methods). As a result, the proportion of prevented transmissions was  
106 36-66%, 46-77%, and 53-82% for testing 1, 2, or 3 times per week, respectively (Fig.  
107 1k). Taking logistics and limited RT-qPCR capacities into account, a test-frequency of  
108 twice per week was considered most effective and was used for the subsequent  
109 implementation of a screening program.

110

### 111 **Implementing the Lolli-Method screening concept in schools and daycare**

112 The Lolli-Method screening concept was implemented as part of a governmental  
113 SARS-CoV-2 testing program in 3,700 elementary schools and special needs schools  
114 in North Rhine-Westphalia, Germany, testing 742,771 students twice a week (Fig. 2a,  
115 Supplementary Table 2). Testing was mandatory for all students. Students had a  
116 median age of 8 years (IQR 2 years) with 354,125 (47.69%) being female and 388,646  
117 (52.32%) being male. On average, 21.1 students were registered per class and 197.3  
118 students per school (Fig. 2b). Sampling was conducted from calendar week 19 to 37  
119 in 2021, which included 8 weeks before (calendar week 19-26) and 5 weeks after  
120 (calendar week 33-37) the summer holidays. During this period, the 7-day incidence in  
121 North Rhine-Westphalia ranged from 14.4 to 146.7 with a maximum in calendar week  
122 34 (Fig. 2c). Notably, while at the beginning the variant of concern (VOC) alpha was  
123 predominant, the delta variant accounted for the majority of cases starting with  
124 calendar week 26 (Fig. 2c).

125 For the 3,700 schools that were located within an area of 34,098 km<sup>2</sup>, sample  
126 transport as well as RT-qPCRs were performed by 12 diagnostic laboratories  
127 (Supplementary Fig. 2, Supplementary Data 6). All RT-qPCR results were reported to  
128 a central database and data was checked for plausibility and invalid items were  
129 removed (Supplementary Fig. 3). In total, 1,110,033 RT-qPCRs were carried out  
130 (983,941 pool-and 126,092 single-RT-qPCRs). Average pool-size was 10.2 and 16.7

131 Lolli-swabs/pool during calendar weeks 19-21 and 22-26/33-37, respectively,  
132 estimating an overall SARS-CoV-2 testing of 16,943,470 swabs within a time period of  
133 13 weeks (Fig. 2d). Mean turn-around time for processing of pool-RT-qPCRs was 7.59  
134 hours and 9.14 hours for single-RT-qPCRs (Supplementary Fig. 4). 96.2% of all pool-  
135 RT-qPCR results were communicated before 6:00 a.m. on the next day  
136 (Supplementary Data 6). In addition, the Lolli-Method was applied to 698 daycare  
137 facilities in the city of Cologne, testing approximately 48,149 children within the age of  
138 1 to 6 years and 13,577 staff members twice per week for a period of 6 months  
139 (Supplementary Fig. 4). Both in schools and daycare facilities, the program was well  
140 accepted and continued beyond the reported time period.

141 We concluded that the Lolli-Method can be applied to educational settings  
142 including daycare facilities for high-throughput testing of SARS-CoV-2 infections.

143

#### 144 **Monitoring SARS-CoV-2 infections in schools**

145 In total, 6,364 of 983,941 pool-RT-qPCRs in schools tested positive (0.65%). 1,316  
146 pool-RT-qPCRs tested positive before (calendar week 19-26), while 5,048 tested  
147 positive after the summer holidays (calendar week 33-37) (Fig. 3a). The rate of  
148 positivity of pool-RT-qPCRs was 0.46% in calendar week 19 and decreased  
149 continuously to 0.05% in calendar week 26. After the summer holidays, rate of positivity  
150 decreased from 2.61% in calendar week 33 to 0.92% in calendar week 37 (Fig. 3b).  
151 The number of infected individuals per positive pool-RT-qPCR was estimated to be 1.3  
152 on average (Supplementary Fig. 6). In order to determine the false-negative rate of the  
153 implemented Lolli-Method, we investigated all reported index-cases of children  
154 attending elementary schools in the city of Cologne from calendar week 19 to 36  
155 (n=653, Supplementary Fig. 7). To this end, contact-tracing information was obtained  
156 by the local health authorities on 569 from 653 index-cases (87.1%). When excluding



157 index-cases that were not tested by the Lolli-Method within 72h before their positive  
158 test, detection rate of the Lolli-Method of confirmed index-cases was 89.1%  
159 (Supplementary Fig. 7), indicating a reliable detection of SARS-CoV-2 infections in  
160 children. Furthermore, we confirmed the effect of the sample dilution by the pooling  
161 procedure described in the validation of the Lolli-Method (Figure 1g) by comparing the  
162 Ct-values of the pool-RT-qPCRs and the corresponding single-RT-qPCRs (mean Ct-  
163 values 30.07 vs. 32.3,  $p < 0.0001$ , Wilcoxon-matched-pairs signed rank test;  
164 Supplementary Fig. 8)

165 SARS-CoV-2 7-day pool-incidence (= number of positive pool-RT-qPCRs/100.000  
166 tested children in 7 days, see Methods, also for determination of number of samples  
167 per pool-RT-qPCR) varied among districts from 0 to 416.2 (Fig. 3c) and correlated with  
168 SARS-CoV-2 incidence of the general population within a district ( $r = 0.76$ ,  $p < 0.0001$ ;  
169 Fig. 3d). Of 3,700 participating schools, 3,648 were tested before and after the summer  
170 holidays. Of those, 2,315 (63.46%) schools were found to have at least one positive  
171 pool-RT-qPCR result, with numbers of positive pool-qPCRs per school ranging from 1  
172 (22.2%), 2 (15.8%) and 3 (9.5%) to a maximum of 22 (0.03%, Fig. 3e).

173 Moreover, we investigated potential associations of SARS-CoV-2 infections in  
174 schools with grade levels, type of school, population density and socioeconomic status  
175 (SES) quantified using a school social deprivation index (SSDI)<sup>22</sup>. This index had been  
176 generated using a confirmatory factor analysis in which schools were assigned to  
177 social deprivation levels on a scale from 1 to 9 with 1 reflecting the highest SES and 9  
178 the lowest. While no association between infections and grade levels or type of school  
179 was found, a moderate correlation for population density ( $r = 0.56$ ,  $p < 0.0001$ ) was  
180 detected. Moreover, the SSDI strongly correlated with the average number of positive  
181 pool-RT-qPCRs per student and per school ( $r = 0.99$ ,  $p < 0.0001$ ) (Fig. 3f and 3g).

182 We concluded that the Lolli-Method is capable of reliably detecting SARS-CoV-  
183 2 infections in schools and is a valuable tool to determine factors associated with  
184 SARS-CoV-2 infections in schools.

185

### 186 **High-throughput screening reveals differences in infection dynamics for SARS-** 187 **CoV-2 variants in schools**

188 Based on molecular surveillance data published by the German public health institute  
189 (Robert Koch Institute) (Fig. 2c), we estimated the fraction of positive pool-RT-qPCRs  
190 assigned to the alpha variant (B.1.1.7) to be 92.9% before the summer holidays while  
191 99.54% were assigned to the delta variant (B.1.167.2) after the summer holidays (Fig.  
192 4a). Mean Cycle threshold (Ct)-values of positive pool-RT-qPCRs decreased  
193 significantly after the summer holidays, with an average Ct-value of 33.61 before (alpha  
194 variant) and 32.55 after (delta variant) the summer holidays ( $p < 0.0001$ , Mann-Whitney  
195 test). While the overall difference was small (1.06 Ct-values), pool-RT-qPCRs tested  
196 positive with high viral loads (Ct-value  $\leq 25$ ) were observed 3.1-fold more often for the  
197 delta variant compared to the alpha variant (Fig. 4b and 4c). Moreover, for viral loads  
198 detected with Ct-values  $\leq 20$ , the difference between alpha and delta was even 7.6-  
199 fold.

200 In order to estimate a possible effect of the increase in pool-RT-qPCRs with low  
201 Ct-values on infection dynamics, the increase in positive pool-RT-qPCRs containing  
202 more than one infected child was statistically modeled, using data from calendar weeks  
203 19-25 (alpha period) and calendar weeks 34-37 (delta period). The numbers of infected  
204 children per positive pool-RT-qPCRs expected by chance and without in-class  
205 transmissions (Null model) were estimated, while controlling for local incidence rates  
206 and the SSDI, and compared to the observed number (Methods and Supplementary  
207 Fig. 9). During alpha- and delta periods, numbers of positive pool-RT-qPCRs

208 containing more than one infected child were 13 and 79, respectively, while 14.27 and  
209 63.4 were expected based on the Null model (Fig. 4e). The ratio between observed  
210 and expected frequencies of pool-RT-qPCRs containing more than one infected child  
211 was 0.9 for the alpha period and 1.25 for the delta period (Fig. 4f). This amounted to  
212 an increase of 36.8% in positive pool-RT-qPCRs containing more than one infected  
213 child during the delta period.

214 We concluded that, during the delta period, more children with higher viral loads  
215 were present in schools and that parameters changing infection dynamics can be  
216 detected by applying the Lolli-Method in schools.

217

## 218 **Discussion**

219 During the pandemic, schools have been frequently closed to reduce SARS-CoV-2  
220 transmissions<sup>23</sup>. However, closure of schools and daycare facilities have had a  
221 substantial impact on development, physical and mental health of children<sup>8–10,24</sup>.  
222 Therefore, concepts are essential to support safe and open school settings. This is  
223 particularly important as new VOCs emerge that may substantially change infection  
224 dynamics.

225 Systematic testing can prevent transmissions in educational settings and gain  
226 insights of measures for infection control in children<sup>14</sup>. In addition, effective test  
227 strategies may allow to use NPIs more specifically and to reduce quarantine measures  
228 to keep school absence of children to a minimum<sup>14</sup>. Effective screening strategies  
229 require an easy and non-invasive sample collection, high sensitivity assays for early  
230 detection of infections, and high-throughput application<sup>25</sup>. As one SARS-CoV-2 test  
231 strategy, RADTs have been used<sup>26</sup>. While RADTs have the advantage of providing  
232 immediate test results, disadvantages include limited sensitivity<sup>17</sup>, variation in  
233 specimen quality<sup>27</sup>, and limited feasibility of self-sampling by young children. Finally, a

234 high acceptance was observed for sample collection based on the Lolli-Method as  
235 demonstrated in a previous study<sup>28</sup>.

236 RT-qPCR-based approaches for SARS-CoV-2 screenings in schools have been  
237 described<sup>15,29,30</sup>. In these studies, different specimens, such as buccal and anal swabs  
238 as well as gargling solutions and saliva samples were obtained. Some of these  
239 sampling methods may cause difficulties, e.g. gargling solutions may increase the risk  
240 of viral transmission during sampling because of aerosol generation. Moreover,  
241 strategies that depend on sample-pooling in the diagnostic laboratory require  
242 significantly more capacities in comparison of processing Lolli-swabs that have already  
243 been pooled in schools<sup>31,32</sup>. Considering limited resources of RT-qPCR-capacities, the  
244 Lolli-Method can therefore be advantageous as demonstrated by our report in which  
245 less than 1.2 million RT-qPCRs were performed for investigating a total of 16.5 million  
246 swabs. However, high SARS-CoV-2 incidences yield larger numbers of positive pools  
247 associated with increasing numbers of follow-up single RT-qPCRs, which reduces the  
248 benefit of a pooling strategy and limit the application of pool-testing in high incidence  
249 settings<sup>33</sup>.

250 There is an urgent medical need to determine the role and effect of NPIs in  
251 educational settings, such as school-closures<sup>34</sup>, mandatory mask usage<sup>35</sup>, and split-  
252 class lessons<sup>36</sup>. Notably, the described screening was sensitive enough to detect  
253 biological differences of the infection dynamics between the alpha and the delta  
254 variant<sup>37</sup>. Thus, the Lolli-Method may be further used to assess infection dynamics  
255 introduced by new variants<sup>21</sup> as well as determine the impact of measures taken in  
256 schools to prevent SARS-CoV-2 infections. Moreover, we could show a correlation  
257 between infection rates in schools and regional SARS-CoV-2 incidence which is in line  
258 with previous studies<sup>16,38</sup>.

259           Limitations of our report include aspects of the data quality. These contain i)  
260 reporting of the viral load as non-standardized Ct-values and ii) incomplete reporting  
261 of pool-sizes. However, there is a high level of consistency and comparability of Ct-  
262 values since RT-qPCRs were performed by the same laboratories during the course of  
263 the screening. In addition, due to the obligation for students to participate in the  
264 screening program, we were able to estimate pool-sizes by extrapolation from reported  
265 data. One limitation of pool testing is that it is particularly suitable for low to medium  
266 SARS-CoV-2 incidences. For this reason, we consider it necessary to develop scalable  
267 modifications for the test concept for high-incidence phases (e.g. pool-size adjustment  
268 or additional use of RADTs). Finally, we do not provide real life effectiveness data of  
269 the Lolli-Method screening program in direct comparison with other screening  
270 programs (e.g. RADT settings). Therefore, further analyses are necessary to determine  
271 the effectiveness to reduce SARS-CoV-2 infections in children and the entire  
272 population using Lolli-testing in schools.

273           In summary, we developed, validated and implemented a non-invasive and  
274 sensitive technique for SARS-CoV-2 (self)-sampling that can be used for high-  
275 throughput application and screening. We consider this sampling method applicable to  
276 schools and daycare facilities providing a reliable tool for screening and surveillance  
277 of SARS-CoV-2 infections in children.

278  
279  
280  
281  
282  
283  
284  
285

286 **Methods**

287 **Ethical considerations**

288 *Prospective Validation of the Lolli-Method*

289 The prospective validation study was approved by the Institutional Review Board (IRB)  
290 of the Faculty of Medicine and University Hospital of Cologne, Cologne, Germany  
291 (number 20-1405) as well as by the IRB of the High Specialty Regional, Villahermosa,  
292 Mexico (number 0130144). The participants were either study patients of the University  
293 Hospital Cologne, Germany or of the test center of the High Specialty Regional  
294 Hospital, Villahermosa, Tabasco, Mexico. All participants gave their written informed  
295 consent before the start of the study.

296

297 *Retrospective analysis of the SARS-CoV-2 screening in schools*

298 The retrospective analysis of the SARS-CoV-2 screening in schools by the University  
299 Hospital of Cologne was engaged by the Ministry of Education and Schools and  
300 approved by the IRB of the Faculty of Medicine, University Hospital of Cologne,  
301 Germany (number 21-1358). Since 10<sup>th</sup> of May 2021, under the direction of the  
302 Ministry of Schools and Education and as part of the governmental SARS-CoV-2  
303 screening program “Lolli-Test NRW”, two Lolli-tests per week combined with a pooled  
304 RT-qPCR analysis were mandatory for all students at elementary schools and special  
305 needs schools in the state of North Rhine-Westphalia. Because testing was mandatory  
306 and in line with German law, no informed consent was required and obtained. 12  
307 diagnostic laboratories were involved in processing the Lolli-swabs. These laboratories  
308 transmitted anonymized, de-identifiable data to a digital database (Medeora Köln  
309 GmbH) for quality assurance purposes. Data were transmitted for pool-RT-qPCRs and  
310 single RT-qPCRs. For pool-RT-qPCRs, date of sampling, time of registration and result  
311 communication, the name of the school, the name of the class, the number of students

312 per pool and the test result were transmitted. For single-RT-qPCRs, date of sampling,  
313 time of registration and result communication, the name of the school, the name of the  
314 class, age, gender and the test result were transmitted. From the digital database, data  
315 were transmitted to the University Hospital Cologne for retrospective analysis.

316

#### 317 *Retrospective analysis of the SARS-CoV-2 screening in daycare facilities*

318 For retrospective analysis of the SARS-CoV-2 screening in daycare facilities, the  
319 University of Cologne was engaged by the Youth Welfare Office of the city of Cologne  
320 and approved by the IRB of the Faculty of Medicine, University Hospital of Cologne,  
321 Germany (number 21-1358). Since 15<sup>th</sup> of March 2021, voluntary SARS-CoV-2 testing  
322 was offered to all daycare facilities in Cologne within the SARS-CoV-2 screening  
323 program “Kita Testung Köln (KiKo)” under the direction of the Youth Welfare Office of  
324 the city of Cologne. Of all participating children and staff members, two Lolli-Swabs per  
325 week were tested in a pooled RT-qPCR. One diagnostic laboratory was involved in  
326 processing the Lolli-swabs. This laboratory transmitted anonymized, de-identifiable  
327 data to the University Hospital of Cologne for retrospective analysis weekly. Data were  
328 transmitted for pool-RT-qPCRs and single RT-qPCRs. For pool-RT-qPCRs, date of  
329 sampling, time of registration and result communication, the name of the daycare  
330 facility, the name of the group, the number of individuals per pool and the test result  
331 were transmitted. For single-RT-qPCRs, date of sampling, time of registration and  
332 result communication, the name of the daycare facility, the name of the group, age,  
333 gender and the test result were transmitted.

334

335

336

337

338 **Instructions for the SARS-CoV-2 screenings in schools and daycare facilities**

339 All staff, parents and children were instructed by either the Ministry of Education and  
340 Schools of North Rhine-Westphalia or the Youth Welfare Office of the city of Cologne.  
341 Written instructions in 12 different languages as well as instructional videos were used  
342 for training of all involved individuals. In addition, information and instructions for  
343 parents, children and staff were made available online  
344 (<https://www.schulministerium.nrw/lolli-tests>, <https://www.kita-testung-koeln.de>)

345

346 **Sample processing**

347 *Validation of the Lolli-Method*

348 To determine the sensitivity of the Lolli-Method, matched Lolli-swabs and Np/Op-  
349 swabs of acutely infected individuals were obtained. The participants were instructed  
350 to suck on a regular swab it for 30 seconds. Very young children were supported by  
351 either their parents or a physician. Afterwards, a physician took an Np-/Op-swab.

352 To find out, whether the time of day at which the samples were taken had an  
353 impact on the sensitivity, the individuals were sampled either in the morning, one hour  
354 after breakfast or at any time of the day. The impact of the pooling process on the  
355 measured viral loads was determined by obtaining two Lolli-swabs from the same  
356 participant at the same time. One sample was tested in a pool-RT-qPCR with up to 17,  
357 49 or 99 negative samples and the corresponding sample was tested in a single-RT-  
358 qPCR. To determine whether the detection rate depends on a particular swab type that  
359 is used for the sampling, the following four types of swabs were used for sample  
360 collection of Lolli-swabs: A) Oropharyngeal swab, Copan, catalog number: 801U059,  
361 B) Nasopharyngeal swab, Biocomma, catalog number: YVJ-TE4, C) Oropharyngeal  
362 swab, Biocomma, catalog number: YVJ-TE4, D) Dry swab, Sarstedt, catalog number:  
363 1U059S01.



364           When tested in a single-RT-qPCR, each Lolli-swab was placed in a 2 ml tube  
365 pre-filled with 2 ml phosphate buffered saline (PBS), moved up and down and pressed  
366 against the bottom of the tube repetitively for 20 seconds. The Np/Op-swabs were  
367 vortexed in the viral transport media for 20 seconds. When tested in a pool-RT-qPCR,  
368 a Lolli-swab of one acutely infected individual was tested in a pool with 17, 49 or 99  
369 Lolli-swabs of individuals not infected with SARS-CoV-2. A pool of Lolli-swabs was  
370 processed by placing the Lolli-swabs in one 50 ml centrifugation tube, adding 3 ml PBS  
371 and vortexing for 30 seconds. Of all samples, 1 ml each was used for SARS-CoV-2  
372 detection.

373

#### 374 *SARS-CoV-2 screening in schools and daycare facilities*

375 Lolli-swabs were used as described above for the sampling of the students in schools  
376 and children and the staff in daycare facilities. The staff was instructed for self-sampling  
377 and supervising of the sampling of the children. The samples of all participants of the  
378 same daycare group or school class were placed in one 50 ml centrifugation tube and  
379 transported to one of the 12 diagnostic laboratories. 3 ml PBS were pipetted in one  
380 centrifugation tube. The tube was vortexed for 30 seconds.

381

#### 382 **SARS-CoV-2 detection and quantification**

##### 383 *Validation of the Lolli-Method*

384 For SARS-CoV-2 detection, either COBAS 6800 (Roche Diagnostics) and Alinity m  
385 (Abbott) instruments equipped with their respective SARS-CoV-2 detection kits, or the  
386 Quantstudio 5 (Thermofisher) instrument, using the Quick-RNA Viral Kits (Zymo  
387 Research) for RNA isolation and GeneFinder™ COVID-19 Plus RealAmp was used.  
388 For the comparison of cycle threshold (Ct) values measured by the different RT-qPCR  
389 equipments, Ct-values were translated into copies/ml. To this end, seven serial

390 dilutions from a high titer SARS-CoV-2 sample were tested in all RT-qPCR equipments  
391 described above. With help of a regression model, standard curves for each equipment  
392 were generated. For the following conversion of device-specific Ct-values into  
393 copies/ml, two SARS-CoV-2 samples with a quantified RNA load from INSTAND  
394 (Society for the Promotion of Quality Assurance in Medical Laboratories, e.V.,  
395 Düsseldorf, Germany; in cooperation with the Robert Koch-Institute and the Institute of  
396 Virology, Charité, Berlin) were tested on every device and subsequently used for Ct-  
397 based absolute RNA quantification.

398

### 399 *SARS-CoV-2 screening in schools and daycare facilities*

400 For SARS-CoV-2 detection, the 12 laboratories reported to use different equipment  
401 which is listed in Supplementary Table 3. Viral load was reported as Ct-value.

402

### 403 **Adapting the SEIR-Model for a SARS-CoV-2 screening of children**

404 A compartmental epidemiological model was used to study the efficiency of a long-  
405 term SARS-CoV-2 screening based on the Lolli-Method. The model consists of a  
406 closed population of  $N$  individuals and four possible states for each of them:  
407 Susceptible (S), Exposed (E), Infected (I) and recovered (R) (Figure 1i). Those states  
408 were chosen based on the impact that a long exposed period has on the  
409 epidemiological dynamics and on testing-based non-pharmaceutical interventions<sup>39</sup>.

410       Susceptible individuals get infected by a transmission within the population  
411 (internal infection rate) or by an exogenous transmission from outside the population  
412 (external infection rate), at rates  $r_1$  and  $r_2$  respectively. Overall, the total infection rate  
413 of susceptible individuals is given by

414

415

416 (1)

$$417 \quad r = ar_1 + (1 - a)r_2$$

418  
419 where  $a$  is the fraction of time that individuals interact within the test- population.

420 (2)

$$421 \quad a = \frac{5 \frac{\text{hours}}{\text{day}} \times 5 \text{ weekdays}}{12 \frac{\text{hours}}{\text{day}} \times 7 \text{ day}} \approx 0.3$$

422

423 was chosen in order to approximate interactions within the test-population only  
424 occurring 5 hours per day during weekdays (Mon-Fri) and assuming that on average  
425 there are in total 12 hours per day of interaction in and outside the test-population. The  
426 internal infection rate is defined as

427 (3)

$$428 \quad r_1 = \frac{\beta I}{N}$$

429

430 and the external infection rate as

431 (4)

$$432 \quad r_2 = \beta\pi$$

433

434 where  $I$  is the total number of infectious individuals in the population,  $\pi$  is the global  
435 prevalence and  $\beta$  is the infection-causing contact rate between individuals.

436 An infected individual that is in the exposed state moves into the infectious state at a  
437 constant rate of  $r_e$ :

438 (5)

$$439 \quad r_e = \frac{1}{\tau_e}$$

440 From the infectious state, an infected individual moves to the recovered state at a  
441 constant rate of  $r_i$ :

442 (6)

$$443 \quad r_i = \frac{1}{\tau_i}$$

444

445 These two last stochastic transitions follow homogeneous Poisson processes and  
446 therefore, exposed and infectious periods in the population follow exponential  
447 distributions with corresponding means  $\tau_e$  and  $\tau_i$ .

448

#### 449 **Implementing the sensitivity of the Lolli-Method in the extended SEIR-model**

450 The probability of a positive test result when testing an exposed or infected individual  
451 is  $p_{det}$  given by

452 (7)

$$453 \quad p_{det} = p_{PCR} \times S(VL)$$

454

455 where  $1 - p_{PCR}$  is the false-negative rate of RT-qPCR and  $S(VL)$  is a viral load  
456 dependent sensitivity function. To estimate  $S(VL)$ , we fit the measured sensitivity data  
457 to a sigmoidal function

458 (8)

$$459 \quad S(VL) = \frac{1}{1 + \left(\frac{\log_{10} VL}{\log_{10} VL_{50}}\right)^{-\delta}} \pm 1.96\sigma_S,$$

460

461 where  $VL_{50}$  and  $\delta$  are fit parameters.  $VL_{50}$  corresponds to the viral load at which  
462  $S(VL_{50}) = 0.5$  and  $\delta$  quantifies the steepness of the sigmoidal function. We used the  
463 function `curve_fit` from the `scipy.optimize` library that implements a least squares

464 method. The standard deviation for the fitted curve  $\sigma_S$  was calculated with standard  
 465 error propagation from the standard deviations of the fitted parameters,  $\sigma_{VL_{50}}$  and  $\sigma_\delta$ ,  
 466 as

467 (9)

$$468 \quad \sigma_S = \frac{\left(\frac{\log_{10} VL}{\log_{10} VL_{50}}\right)^{-b}}{\left(\left(\frac{\log_{10} VL}{\log_{10} VL_{50}}\right)^{-b} + 1\right)^2} \sqrt{\left(\frac{\delta}{\log_{10} VL_{50}}\right)^2 \sigma_{VL_{50}}^2 + \left(\log \frac{\log_{10} VL}{\log_{10} VL_{50}}\right)^2 \sigma_\delta^2},$$

469

470 such that  $\pm 1.96\sigma_S$  represents 95% confidence level.

471 In order to determine the time dependence of the sensitivity of the Lolli-Method (days  
 472 since infection), it was assumed that infected individuals would have a viral load of  $10^6$   
 473 copies/ml three days after infection. We assume exponential growth for the viral load  
 474 with constant rate  $g$ :

475 (10)

$$476 \quad VL(t) = e^{gt}$$

477

478 Temporal dynamics of viral load and the associated sensitivity of the Lolli-Method are  
 479 relevant because it was assumed that on average infectiousness would begin three  
 480 days after infection (Fig. 1j). Thus, in this model, transmissions within the institutions  
 481 can only take place when the infection occurred at least three days ago. Infected  
 482 individuals would be infectious on average for 6 days. A summary of model inputs can  
 483 be found in Supplementary Table 1<sup>37,40–48</sup>.

484 The numerical dynamics consist of continuous-time and individual-based  
 485 simulations, in which the transitions between states of each individual are  
 486 stochastically determined using the Gillespie algorithm. Additionally, a testing scheme  
 487 was implemented in which infected individuals were tested positive according to

488  $p_{det}(t)$ . Detected individuals were removed from the interacting population and the rest  
489 of the population was quarantined for the next 14 days one day after the detection.  
490 After this period, individuals could interact again. In this way, infected individuals that  
491 were not tested positive could transit to a recovered state without infecting other  
492 individuals in the test-population. We simulated testing protocols of 1 test per week (on  
493 Wednesday), 2 tests per week (Tuesday and Thursday) and 3 days per week (Monday,  
494 Wednesday and Friday.)

495

### 496 **Calculation of 7-day pool incidence in schools**

497 Pool-sizes were estimated by a linear model using official data by the Ministry of  
498 Schools and Education of North Rhine-Westphalia on class sizes and available  
499 reported pool-sizes (Supplementary Fig. 10a). During the first three weeks of the  
500 screening, students were taught and tested in a split-class lesson model, while a full-  
501 class lesson model was the basis of lessons and testing for the rest of the screening.  
502 During split-class lessons, 50% of the students of one class attended lessons and were  
503 tested on Mondays and Wednesdays. The other 50% of the students attended lessons  
504 and were tested on Tuesdays and Thursdays. During full-class lessons, the whole  
505 class attended lessons daily and was tested either Mondays and Wednesdays or  
506 Tuesdays and Thursdays (Supplementary Fig. 10b). Pool sizes were reported by the  
507 tested schools (Supplementary Fig. 10c). Means of class-sizes per school and means  
508 of reported pool-sizes per school were mapped as part of a linear model with a forced  
509 Y-axis intercept of 0. (Supplementary Fig. 10d) Slopes during spit-class lessons were  
510  $m=0.97$  and during full-class lessons  $m=0.97$  before and  $0.96$  after summer holidays.  
511 Thus, reported average pool-sizes per school corresponded to approximately 97% and  
512 96%, respectively, of the average class-sizes per school. For this reason, average  
513 class-sizes per school were used as an estimate of the average pool-sizes per school

514 for the estimation of number of children tested and the subsequently calculated 7-days-  
515 pool-incidence (pool-incidence= number of positive pool-RT-qPCRs/100.000 tested  
516 children in 7 days)

517

### 518 **School social deprivation index (SSDI)**

519 The level of social deprivation of schools is measured by a nine-level school social  
520 deprivation index (SSDI). The index is generated via a confirmatory factor analysis with  
521 four indicator variables<sup>22</sup>. The latent variable is divided into nine classes: Level 1  
522 corresponds to a very low social deprivation; level 9 corresponds to a very high social  
523 deprivation. The index is based on several school-related indicators:

- 524 1. Child and youth poverty in the vicinity of an elementary school
- 525 2. Proportion of students with predominantly non-German family languages
- 526 3. Proportion of students who have moved to Germany from abroad
- 527 4. Proportion of students with special educational needs for learning, emotional  
528 and social development and language

529 The selection of the indicators is based on two criteria: First, to reflect socio-  
530 demographic variables relevant to school performance, and second, to avoid additional  
531 data collection and to use data that are uniformly available across the state.

532 With the exception of the indicator for child and youth poverty, all data come from the  
533 official school statistics of the state of North Rhine-Westphalia. A kernel-density  
534 estimate for the residential addresses of minors in unemployment/social-assistance-  
535 beneficiary households from the statistics of the Federal Employment Agency forms  
536 the indicator for child and youth poverty. It is a location statistic that shows the spatial  
537 density of minors in the vicinity of schools. The fourth indicator is included in the model  
538 as an interaction indicator (indicator of child and youth poverty \* proportion of students  
539 with special educational needs). Therefore, a correlation between the interaction

540 indicator and the indicator for children and youth poverty was allowed in the factor  
541 model.

542 The index shows good explanatory power for different learning outcomes when  
543 evaluated with the results of the centrally organized performance assessments VERA  
544 3 (e.g. correlation with reading comprehension in German results in  $R^2 = 0.39$ ).

545 The SSDI was formed for each school as a superordinate unit of several  
546 locations. These locations are referred to in the manuscript as „schools“. The analysis  
547 of the correlation between SSDI and SARS-CoV-2 infections is based on the test data  
548 from these locations, but is carried out using the school as the superordinate unit.

549

### 550 **SARS-CoV-2 infection dynamics in schools**

551 Estimating the differences between SARS-CoV-2 variants in infection dynamics in  
552 schools was based on the notion that transmissions inside school classes (in-class  
553 transmissions) should lead to an excessive number of pool-RT-qPCRs containing more  
554 than one infected child. We implemented this notion by first estimating the expected  
555 number of pool-RT-qPCRs with more than one infected child assuming a Null model  
556 without in-class transmissions. We next compared the expected number of pool-RT-  
557 qPCRs with more than one infected child to the observed number of pool-RT-qPCRs  
558 with more than one infected child.

559 Positive pool-RT-qPCRs were filtered based on the following criteria to ensure  
560 only high-quality data is used for this analysis: i) only pool-RT-qPCRs that have a  
561 matching positive single-RT-qPCR, ii) number of following single-RT-qPCRs is within  
562 20% of the pool size.

563 First, we calculated the probability of each tested child being infected under the  
564 Null model. To calculate the probability of each tested child being infected, we fitted a  
565 single logistic regression model for the entire testing period (calendar week 19-25, 34-



566 37) using the local (district level) 7-day incidence of children aged between 6 and 10  
567 years, the rate of positivity of pool-RT-qPCRs per district and per calendar week and  
568 the school social deprivation index (SSDI) as predictors (covariates),

569 (11)

$$570 \quad p(P_{iw}) = p_{iw} = \beta_1 \cdot I_{iw} + \beta_2 \cdot PR_{iw} + \beta_3 \cdot SSDI_i + \beta_4 \cdot I_{iw}SSDI_i + \beta_5 \cdot PR_{iw}SSDI_i$$

571

572 where  $P_{iw}$  is the event that a specific child in a positive pool-RT-qPCR in school  $i$  and  
573 week  $w$  is tested positive,  $p_{iw}$  is the probability of being infected per child,  $I_{iw}$  is the local  
574 7-day incidence among children aged between 6 and 10 years,  $PR_{iw}$  is the rate of  
575 positivity of pool-RT-qPCRs per district and per calendar week  $w$ ,  $SSDI_i$  is the school  
576 social deprivation index of school  $i$  and  $\beta_{1-5}$  are the regression coefficients.

577 After fitting the above regression coefficients, we calculated the probability of being  
578 infected per child  $p_{iw}$  for each positive pool RT-qPCR. Each such pool contains at least  
579 one infected child by definition. We computed the probability of observing additional  
580 infected children assuming a binomial distribution,

581 (12)

$$582 \quad P(X) = \frac{n}{k} \cdot p_{iw}^k \cdot (1 - p_{iw})^{n-k}$$

583

584 where  $p_{iw}$  is the probability of each child being infected derived from the logistic  
585 regression model above,  $n$  is the number of tested children in a pool-RT-qPCR and  $k$   
586 is the number of additional infected children. Using this binomial distribution, we  
587 computed the expected number of pool-RT-qPCRs with more than one infected child  
588 under the Null model (i.e. assuming no in-class transmissions). These values were  
589 compared to the observed number of pool-RT-qPCRs with more than one infected child  
590 in a given time period.

591 **Statistical analysis**

592 Geometric means were calculated for viral loads. Differences in viral loads were  
593 calculated with Wilcoxon-signed rank test (WSR) and Friedman test (FT). P-values  
594 <0.05 were considered significant. Sensitivity (positive percent agreement) and  
595 specificity (negative percent agreement) were calculated using RT-qPCR agreement.  
596 Differences in Ct-values during the screening program were calculated with Mann-  
597 Whitney test (MWT). Data analyses were done using the software GraphPad Prism  
598 (v.9), Microsoft Excel for Mac (v.14.7.3.) and R programming language (v. 3.5.2, stats  
599 package).

600

601 **Additional Software**

602 Maps of North Rhine-Westphalia and Cologne were designed with the iMapU tool  
603 provided by iExcelU.

604

605 **Data availability**

606 The data that support the findings of this study are provided with this paper. Source  
607 data are provided in Supplementary Data 1-6 and Supplementary Table 2.

608

609 **Code availability**

610 Codes of the epidemiological simulations are available in the Github repository  
611 [https://github.com/betoto008/lolli\\_testing](https://github.com/betoto008/lolli_testing)<sup>49</sup> and in Supplementary Data 7. Codes of the  
612 statistical modelling are available in the Github repository  
613 <https://github.com/beyergroup/Lolli-Test-NRW.git><sup>50</sup> and in Supplementary Data 8.

614

615

616

617 **References**

- 618 1. Christophers, B. *et al.* Trends in clinical presentation of children with COVID-  
619 19: a systematic review of individual participant data. *Pediatr. Res.* **10**, 1390-  
620 020-01161–3 (2020).
- 621 2. Tagarro, A. *et al.* Screening and Severity of Coronavirus Disease 2019  
622 (COVID-19) in Children in Madrid, Spain. *JAMA Pediatr.* e201346 (2020).
- 623 3. Ward, H. *et al.* SARS-CoV-2 antibody prevalence in England following the first  
624 peak of the pandemic. *Nat. Commun.* **4**, 100098 (2021).
- 625 4. Say, D. *et al.* Post-acute COVID-19 outcomes in children with mild and  
626 asymptomatic disease. *Lancet Child Adolesc. Heal.* **5**, e22–e23 (2021).
- 627 5. Jones, T. C. *et al.* Estimating infectiousness throughout SARS-CoV-2 infection  
628 course. *Science (80-. ).* **973**, eabi5273 (2021).
- 629 6. Chu, V. T. *et al.* Household Transmission of SARS-CoV-2 from Children and  
630 Adolescents. *N. Engl. J. Med.* **385**, 954–956 (2021).
- 631 7. Covid 19 and School Closures: One Year of Education Disruption. *Unicef*  
632 (2021).
- 633 8. Hawrilenko, M., Kroshus, E., Tandon, P. & Christakis, D. The Association  
634 between School Closures and Child Mental Health during COVID-19. *JAMA*  
635 *Netw. Open* **4**, e2124092 (2021).
- 636 9. Lee, J. Mental health effects of school closures during COVID-19. *Lancet Child*  
637 *Adolesc. Heal.* **4**, 421 (2020).
- 638 10. Monnier, M. *et al.* Children’s mental and behavioral health, schooling, and  
639 socioeconomic characteristics during school closure in France due to COVID-  
640 19: the SAPRIS project. *Sci. Rep.* **11**, 1–15 (2021).
- 641 11. Pavelka, M. *et al.* The impact of population-wide rapid antigen testing on  
642 SARS-CoV-2 prevalence in Slovakia. *Science (80-. ).* **372**, 635–641 (2021).

- 643 12. Im Kampe, E. O., Lehfeld, A. S., Buda, S., Buchholz, U. & Haas, W.  
644 Surveillance of COVID-19 school outbreaks, Germany, March to August 2020.  
645 *Eurosurveillance* **25**, 2001645 (2020).
- 646 13. Sherby, M. R. *et al.* SARS-CoV-2 screening testing in schools for children with  
647 intellectual and developmental disabilities. *J. Neurodev. Disord.* **13**, 31 (2021).
- 648 14. Young, B. C. *et al.* Daily testing for contacts of individuals with SARS-CoV-2  
649 infection and attendance and SARS-CoV-2 transmission in English secondary  
650 schools and colleges: an open-label, cluster-randomised trial. *Lancet* **398**,  
651 1217–1229 (2021).
- 652 15. Hoehl, S. *et al.* Longitudinal Testing for Respiratory and Gastrointestinal  
653 Shedding of Severe Acute Respiratory Syndrome Coronavirus 2 (SARS-CoV-2)  
654 in Day Care Centers in Hesse, Germany. *Clin. Infect. Dis.* **73**, e3036–e3041  
655 (2021).
- 656 16. Willeit, P. *et al.* Prevalence of RT-qPCR-detected SARS-CoV-2 infection at  
657 schools: First results from the Austrian School-SARS-CoV-2 prospective cohort  
658 study. *Lancet Reg. Heal. - Eur.* **5**, 100086 (2021).
- 659 17. Corman, V. M. *et al.* Comparison of seven commercial SARS-CoV-2 rapid  
660 point-of-care antigen tests: a single-centre laboratory evaluation study. *The*  
661 *Lancet Microbe* **2**, e311–e319 (2021).
- 662 18. Aiano, F. *et al.* Feasibility and acceptability of SARS-CoV-2 testing and  
663 surveillance in primary school children in England: Prospective, cross-sectional  
664 study. *PLoS One* **16**, e0255517 (2021).
- 665 19. Vandenberg, O., Martiny, D., Rochas, O., van Belkum, A. & Kozlakidis, Z.  
666 Considerations for diagnostic COVID-19 tests. *Nat. Rev. Microbiol.* **Epub**  
667 **ahead**, 1–13 (2021).
- 668 20. Walter, E. B. *et al.* Evaluation of the BNT162b2 Covid-19 Vaccine in Children 5

- 669 to 11 Years of Age. *N. Engl. J. Med.* **NEJMoa21116**, (2021).
- 670 21. Karim, S. S. A. & Karim, Q. A. Omicron SARS-CoV-2 variant: a new chapter in  
671 the COVID-19 pandemic. *Lancet (London, England)* **6736**, 19–21 (2021).
- 672 22. Schräpler, J. & Jeworutzki, S. *Konstruktion des Sozialindex für Schulen in*  
673 *Nordrhein-Westfalen*. (Zentrum für interdisziplinäre Regionalforschung (ZEFIR),  
674 Fakultät für Sozialwissenschaft, Ruhr-Universität Bochum, LOTA 38, 44780  
675 Bochum, 2021).
- 676 23. Buonsenso, D. *et al.* Schools closures during the COVID-19 pandemic: A  
677 catastrophic global situation. *Pediatr. Infect. Dis. J.* e146–e150 (2021)  
678 doi:10.1097/INF.0000000000003052.
- 679 24. Ghosh, R., Dubey, M. J., Chatterjee, S. & Dubey, S. Impact of COVID-19 on  
680 children: Special focus on the psychosocial aspect. *Minerva Pediatr.* **72**, 226–  
681 235 (2020).
- 682 25. Woloshin, S., Patel, N. & Kesselheim, A. S. False Negative Tests for SARS-  
683 CoV-2 Infection — Challenges and Implications. *N. Engl. J. Med.* (2020)  
684 doi:10.1056/nejmp2015897.
- 685 26. Hoehl, S. *et al.* At-home self-testing of teachers with a SARS-CoV-2 rapid  
686 antigen test to reduce potential transmissions in schools Results of the SAFE  
687 School Hesse Study. *medRxiv* (2020) doi:10.1101/2020.12.04.20243410.
- 688 27. Allan-Blitz, L. T. & Klausner, J. D. A Real-World Comparison of SARS-CoV-2  
689 Rapid Antigen Testing versus PCR Testing in Florida. *J. Clin. Microbiol.* **59**,  
690 e01107-21 (2021).
- 691 28. Joachim, A. *et al.* Pooled RT-qPCR testing for SARS-CoV-2 surveillance in  
692 schools- a cluster randomised trial. *EClinicalMedicine* **39**, 101082 (2021).
- 693 29. Willeit, P. *et al.* Prevalence of RT-PCR-detected SARS-CoV-2 infection at  
694 schools: First results from the Austrian School-SARS-CoV-2 Study. *medRxiv*

- 695 2021.01.05.20248952 (2021) doi:10.1101/2021.01.05.20248952.
- 696 30. Mendoza, R. P. *et al.* Implementation of a pooled surveillance testing program  
697 for asymptomatic SARS-CoV-2 infections in K-12 schools and universities.  
698 *EClinicalMedicine* **38**, 101028 (2021).
- 699 31. Goldfarb, D. M. *et al.* Self-collected saline gargle samples as an alternative to  
700 healthcare worker collected nasopharyngeal swabs for COVID-19 diagnosis in  
701 outpatients. *medRxiv* (2020) doi:10.1101/2020.09.13.20188334.
- 702 32. Wunsch, M. *et al.* Safe and Effective Pool Testing for SARS-CoV-2 Detection.  
703 *SSRN Electron. J.* (2020) doi:10.2139/ssrn.3684470.
- 704 33. Wunsch, M. *et al.* Safe and effective pool testing for SARS-CoV-2 detection. *J*  
705 *Clin Virol* **145**, 105018 (2020).
- 706 34. Li, Y. *et al.* The temporal association of introducing and lifting non-  
707 pharmaceutical interventions with the time-varying reproduction number (R) of  
708 SARS-CoV-2: a modelling study across 131 countries. *Lancet Infect. Dis.*  
709 (2020) doi:10.1016/S1473-3099(20)30785-4.
- 710 35. Lam-Hine, T. *et al.* Outbreak Associated with SARS-CoV-2 B.1.617.2 (Delta)  
711 Variant in an Elementary School — Marin County, California, May-June 2021.  
712 *MMWR Recomm. Reports* **70**, 1214–1219 (2021).
- 713 36. Van Loon, W. *et al.* Prevalence of SARS-CoV-2 Infections among Students,  
714 Teachers, and Household Members during Lockdown and Split Classes in  
715 Berlin, Germany. *JAMA Netw. Open* **4**, e2127168 (2021).
- 716 37. Campbell, F. *et al.* Increased transmissibility and global spread of SARS-CoV-2  
717 variants of concern as at June 2021. *Eurosurveillance* **26**, 2100509 (2021).
- 718 38. Ismail, S. A., Saliba, V., Lopez Bernal, J., Ramsay, M. E. & Ladhani, S. N.  
719 SARS-CoV-2 infection and transmission in educational settings: a prospective,  
720 cross-sectional analysis of infection clusters and outbreaks in England. *Lancet*

- 721 *Infect. Dis.* **21**, 344–353 (2021).
- 722 39. Tovar, R. M., Gruell, H., Klein, F. & Lässig, M. Stochasticity of infectious  
723 outbreaks and consequences for optimal interventions. (2021).
- 724 40. Quilty, B. J. *et al.* Quarantine and testing strategies in contact tracing for  
725 SARS-CoV-2: a modelling study. *Lancet Public Heal.* **6**, e175–e183 (2021).
- 726 41. Walsh, K. A. *et al.* The duration of infectiousness of individuals infected with  
727 SARS-CoV-2. *J. Infect.* **81**, 847–856 (2020).
- 728 42. Centers for Disease Control and Prevention. COVID-19 Pandemic Planning  
729 Scenarios. *Centers Dis. Control Prev.* (2021).
- 730 43. Volz E, Mishra S, Chand M, Barrett JC, Johnson R, Geidelberg L, Hinsley WR,  
731 Laydon DJ, Dabrera G, O’Toole Á, Amato R, Ragonnet-Cronin M, Harrison I,  
732 Jackson B, Ariani CV, Boyd O, Loman NJ, McCrone JT, Gonçalves S,  
733 Jorgensen D, Myers R, Hill V, Jackson DK, F. N. Assessing transmissibility of  
734 SARS-CoV-2 lineage B.1.1.7 in England. *Nature* **593**, 266–269 (2021).
- 735 44. Davies, N. G. *et al.* Estimated transmissibility and impact of SARS-CoV-2  
736 lineage B.1.1.7 in England. *Science (80-. ).* **372**, eabg3055 (2021).
- 737 45. Alcoba-Florez, J. *et al.* Sensitivity of different RT-qPCR solutions for SARS-  
738 CoV-2 detection. *Int. J. Infect. Dis.* **99**, 190–192 (2020).
- 739 46. Kucirka, L. M., Lauer, S. A., Laeyendecker, O., Boon, D. & Lessler, J. Variation  
740 in False-Negative Rate of Reverse Transcriptase Polymerase Chain Reaction-  
741 Based SARS-CoV-2 Tests by Time Since Exposure. *Ann. Intern. Med.* **173**,  
742 262–267 (2020).
- 743 47. Vogels, C. B. F. *et al.* Analytical sensitivity and efficiency comparisons of  
744 SARS-CoV-2 RT–qPCR primer–probe sets. *Nat. Microbiol.* **5**, 1299–1305  
745 (2020).
- 746 48. Goyal, A., Reeves, D. B., Fabian Cardozo-Ojeda, E., Schiffer, J. T. & Mayer, B.

- 747 T. Viral load and contact heterogeneity predict sars-cov-2 transmission and  
748 super-spreading events. *Elife* **10**, e63537 (2021).
- 749 49. Tovar, R. M. Effective high-throughput RT-qPCR screening for SARS-CoV-2  
750 infections in children, betoto008/lolli\_testing: Lolli testing. (2022)  
751 doi:10.5281/ZENODO.6491118.
- 752 50. Johnen, R. Effective high-throughput RT-qPCR screening for SARS-CoV-2  
753 infections in children, beyergroup/Lolli-Test-NRW. (2022)  
754 doi:10.5281/ZENODO.6497682.

755

## 756 **Acknowledgements**

757 We thank all participants of the validation of the Lolli-Method and all children and staff  
758 in tested daycare facilities and schools. We thank Sascha Nickel and Anne Fries as  
759 well all staff members of their daycare facilities for their impetus for the development  
760 of the Lolli-Method. We thank all members of the Institute of Virology, University  
761 Hospital Cologne. In particular, we thank Irina Fish, Ivonne Torre-Lage, Christina  
762 Hellriegel and Esther Milz for processing of SARS-CoV-2 samples and optimizing the  
763 logistics. We thank Carsten Tschirner (IExcelU) for supporting data visualization,  
764 Stephan Glaremin, Udo Neumann, Anja Kolb-Bastigkeit (Amt für Jugend, Arbeit und  
765 Soziales der Stadt Köln), Barbara Michaelis, Niklas Marizy (Gesundheitsamt Köln) for  
766 administrative support during implementation of the screening in Cologne. We thank  
767 Janna Seifried and Sindy Böttcher (Robert Koch Institute) for continuous support and  
768 discussions, Norbert Schmeißer and Frederik Schmeißer (Medeora GmbH Köln) for  
769 supporting data collection, Kim Zun-Gon, Florian Korte and Hendrik Schöneborn  
770 (Boston Consulting Group) for organizational support, Christoph Gusovius from the  
771 Ministry for Schools and Education of the State of North Rhine-Westphalia, and



772 Dietmar Klimas and Philip Graul (Labor ZotzKlimas, Düsseldorf, Germany) and Philipp  
773 Kirfel (Synlab) for supporting diagnostic analysis.

774

#### 775 **Author contributions**

776 All authors contributed to sections relevant to their experience. F.D., F.K., R.K., I.S.,  
777 G.F., A.B. and J.R. contributed to conception and design of the project. F.D. G.H.R.,  
778 R.K., F.K., V.D.C., G.B.F., D.L.V., A.R.H., A.J., J.M.C., A.T.H., J.R.Q., K.S., M.M.,  
779 J.C.L., C.H., L.T.W., E.H., E.K. and M.W. developed and validated the Lolli-Method.  
780 R.M.T. and M.L. developed the extension of the SEIR-model. G.Q., H.W., C.T., R.Z.,  
781 H.J., A.P., I.H., P.C., F.J.S., P.P., G.K., C.K. performed RT-qPCRs during the  
782 screening programs. M.B., A.W., A.K., J.N. and A.L. partnered as public health  
783 scientists. F.D., R.J., J.G, G.S., F.B., J.K., A.K., C.G. and M.F. performed data analysis.  
784 M.H., R.J., J.P.S. and J.G. performed statistical analysis. F.D., L.J., and V.L. managed  
785 the administrative framework. F.K., G.F., A.B. and J.D. supervised the project. F.D.,  
786 R.M.T., J.G., R.J. S.J. and J.P.S. wrote the draft manuscript. All authors were involved  
787 in editing of the final manuscript

788

#### 789 **Competing interest declaration**

790 F.D., F.K. and R.K. hold EU-wide trademark protection for the terms “Lolli-Test”  
791 (018503959) and “Lolli-Methode” (018503958). All authors have no competing  
792 interests.

793

#### 794 **Additional Information**

795 Supplementary Information is available for this paper.

796 Correspondence should be addressed to [florian.klein@uk-koeln.de](mailto:florian.klein@uk-koeln.de)

797 Funding was provided by the German Ministry of Education and Research (BMBF)  
798 (registration number: 01KX2021) within Bundesweites Forschungsnetz „Angewandte  
799 Surveillance und Testung“ (B-FAST) project of the „NaFoUniMedCovid19“ consortium.  
800 Furthermore, funding was provided by the state of North Rhine-Westphalia and by the  
801 Bundesministerium für Bildung und Forschung (registration number: ZMI1-  
802 2521COR004).

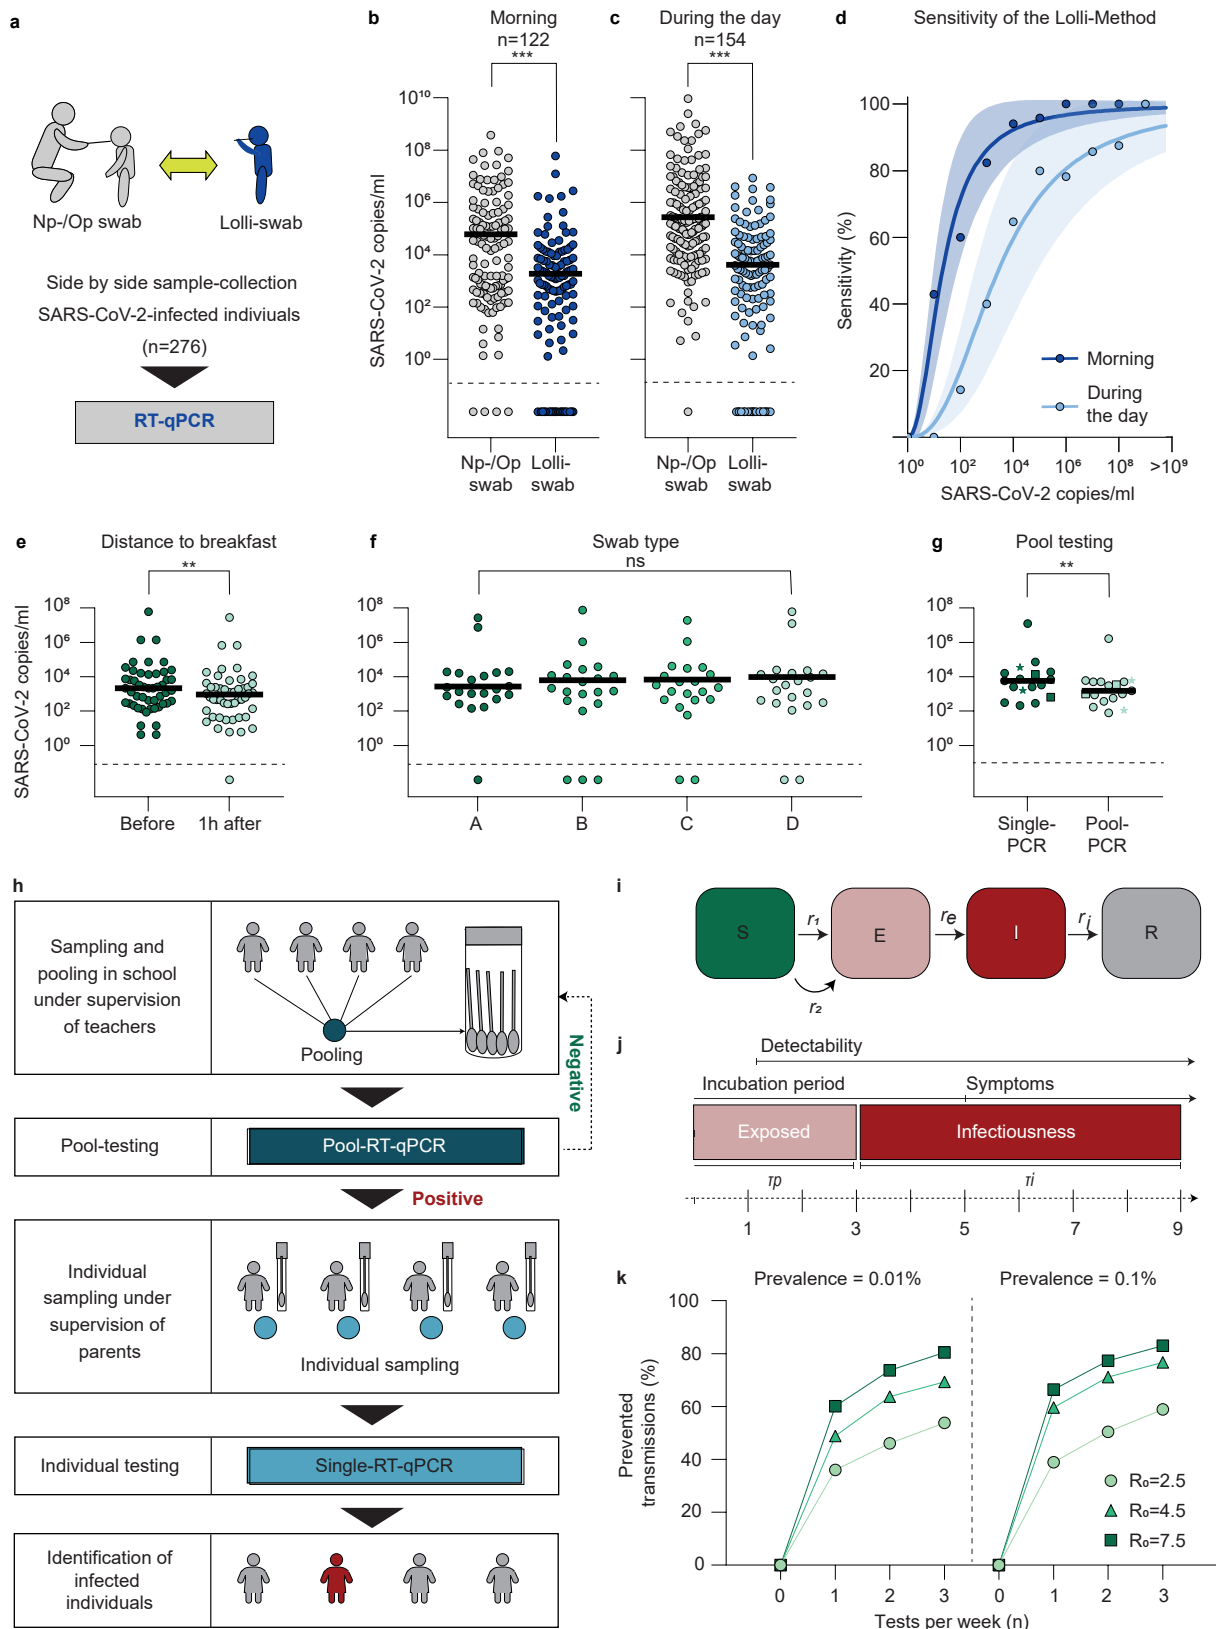

**Fig. 1: Lolli-Method for high-throughput SARS-CoV-2 screening in children**

**a**, Experimental design used to validate the Lolli-Method. **b**, Np-/Op-swabs and Lolli-swabs obtained in the morning plotted by viral load ( $p < 0.0001$ , two-tailed Wilcoxon signed rank test, (WSR)). Horizontal lines represent mean viral loads. Asterisks represent  $p$ -values. **c**, Np-/Op-swabs and Lolli-swabs obtained during the day plotted by viral load ( $p < 0.0001$ , two-tailed WSR). **d**, The sensitivity of the Lolli-Method is stratified by viral load as fit curve (least squares method), indicated by both blue lines. 95 % CI is indicated by colored area and time of sampling is indicated in corresponding colors. **e-g**, Matched Lolli-Swabs plotted by viral loads obtained in the morning and 1 hour after breakfast ( $p = 0.021$ , two-tailed WSR) (**e**), with four types of Lolli-swabs ( $p = 0.72$ , Friedmann test) (**f**), and for single-and pool-RT-qPCR, respectively ( $p = 0.017$ , two-tailed WSR) (**g**). **g**, Dots represent pools of 18, squares of 49 and stars of 100 individuals. **h**, Visualization of the screening concept. Samples are pooled in the classroom and tested in RT-qPCR. Individual RT-qPCRs are tested the next day and only in case of a positive pool. **i**, SEIR-model to determine efficiency of the screening program. **j**, Assumptions for the course of a SARS-CoV-2 infection. **k**, Fractions of prevented transmissions stratified by test-frequency. Dots, triangles and squares represent SARS-CoV-2 basic reproduction values of 2.5, 4.5 and 7.5.

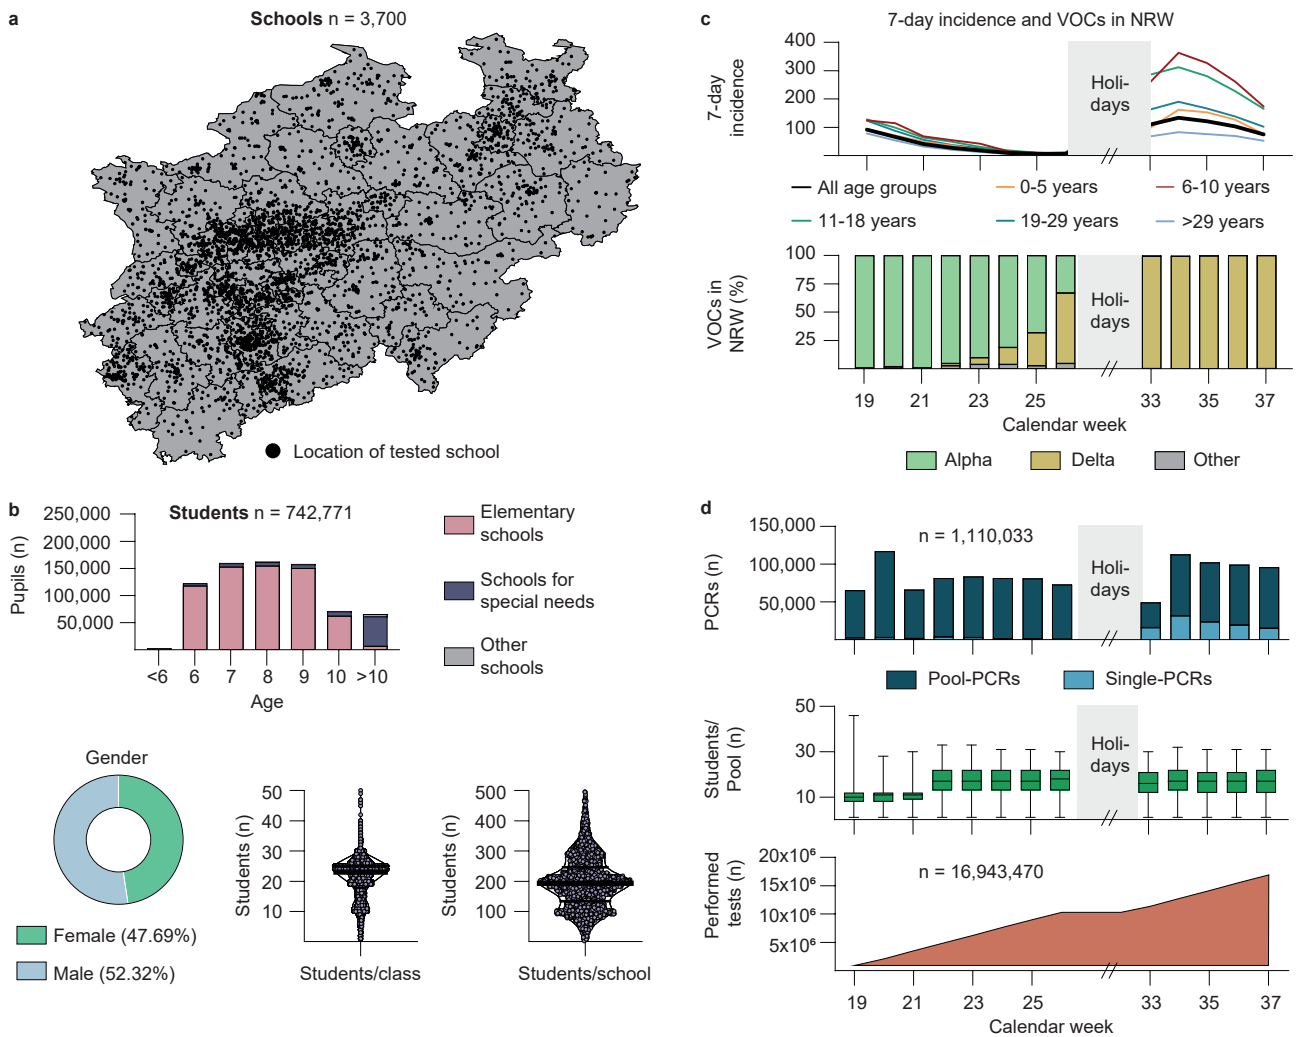

**Fig. 2: Implementing the Lolli-Method screening concept in schools and daycare facilities**

**a**, Map of North Rhine-Westphalia. Black dots mark the location of each school. **b**, Epidemiological characteristics of schools. Black horizontal lines in the violin plots represent median (M), first (Q1) and third (Q3) quartile (Students/class: M=23, Q1=18, Q3=25; Students/schools: M=193, Q1=134, Q3=246). **c**, 7-day incidence of different age groups (top) and frequency of variants of concern according to data published by the Robert Koch Institute (bottom) stratified by calendar week. Summer holidays are marked in grey. **d**, Number of performed RT-qPCRs (blue), average pool-sizes (green) and total number of performed tests are stratified by calendar week. The horizontal lines in the green Box-Whisker-Plot indicate the medians, the lines at the top and at the bottom of the boxes indicate first and third quartiles and the error bars represent minimum and maximum pool-sizes.

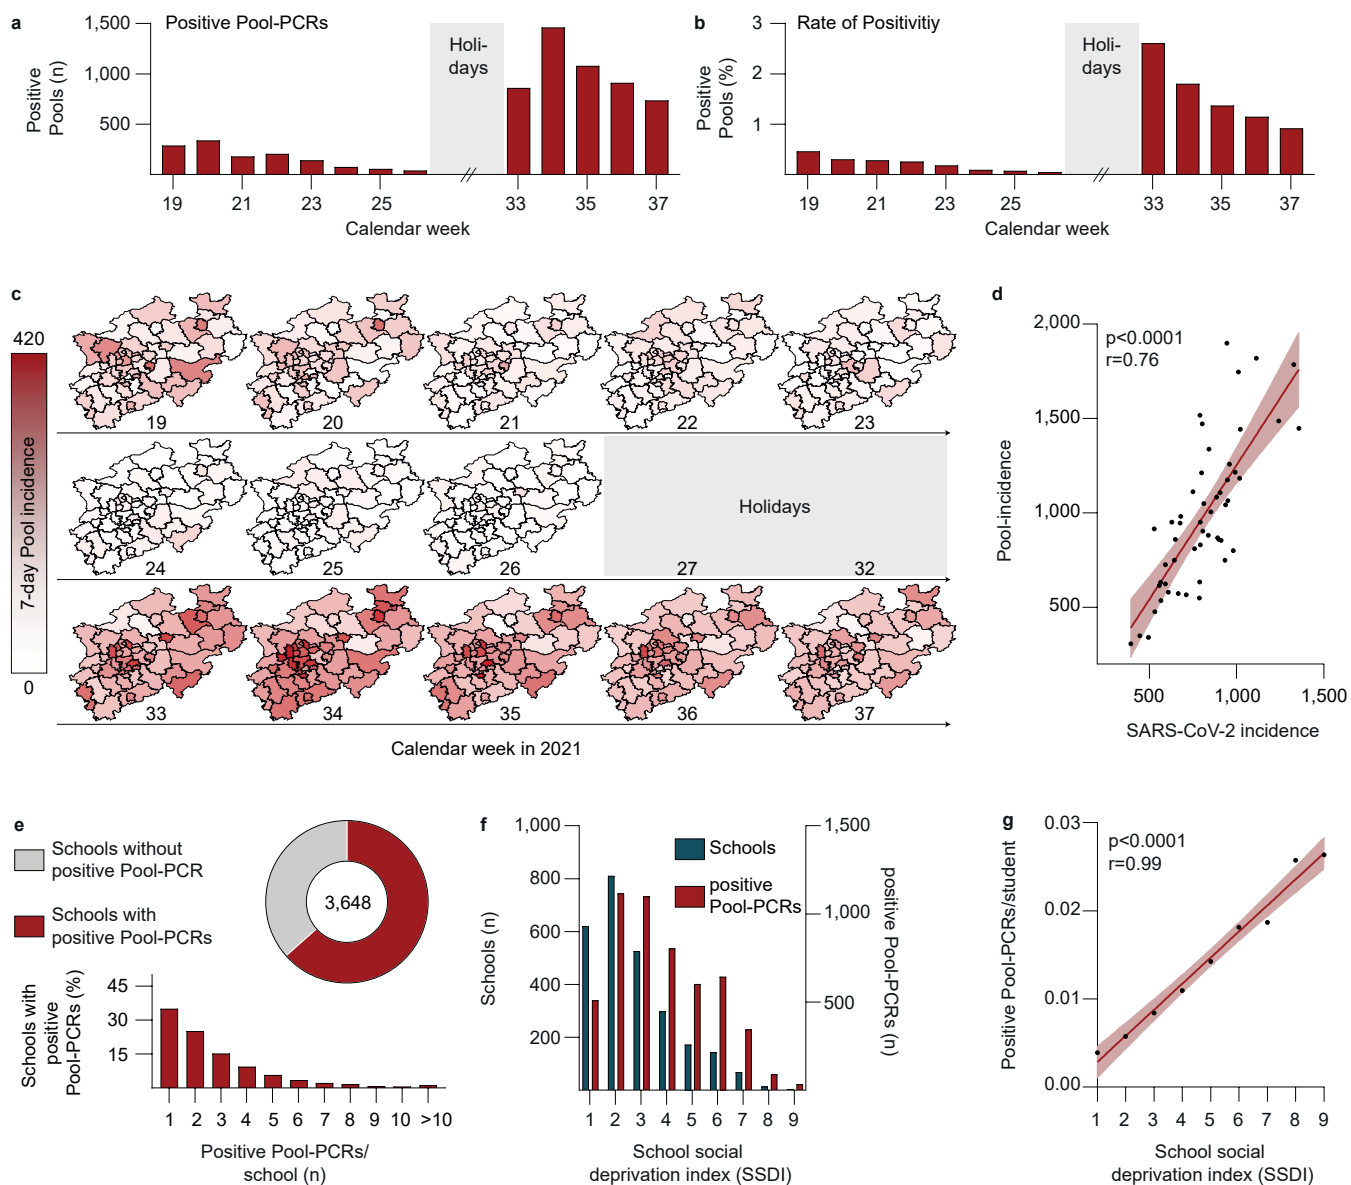

**Fig. 3: Monitoring SARS-CoV-2 infections in schools**

**a**, The number of positive pool-RT-qPCRs is stratified by calendar week. **b**, The rate of positivity of pool-RT-qPCRs stratified by calendar week. **c**, Maps of North Rhine-Westphalia depicting the 7-day pool-incidence per week and district. **d**, Spearman correlation (two-tailed) between pool-incidence and SARS-CoV-2 incidence ( $p < 0.0001$ ,  $r = 0.76$ ). Each black dot represents one district of North Rhine-Westphalia. 95% CI is indicated by the bright red area. **e**, Fraction of schools with at least one positive pool-RT-qPCR (pie-chart) and fraction of schools stratified by corresponding number of positive Pool-RT-qPCRs per school (bar chart). **f**, Number of schools and positive pool-RT-qPCR stratified by school social deprivation index level. **g**, Spearman correlation (two-tailed) between number of positive pool-RT-qPCRs/student and school social deprivation index level ( $p < 0.0001$ ,  $r = 0.99$ ). 95% CI is indicated by the bright red area.

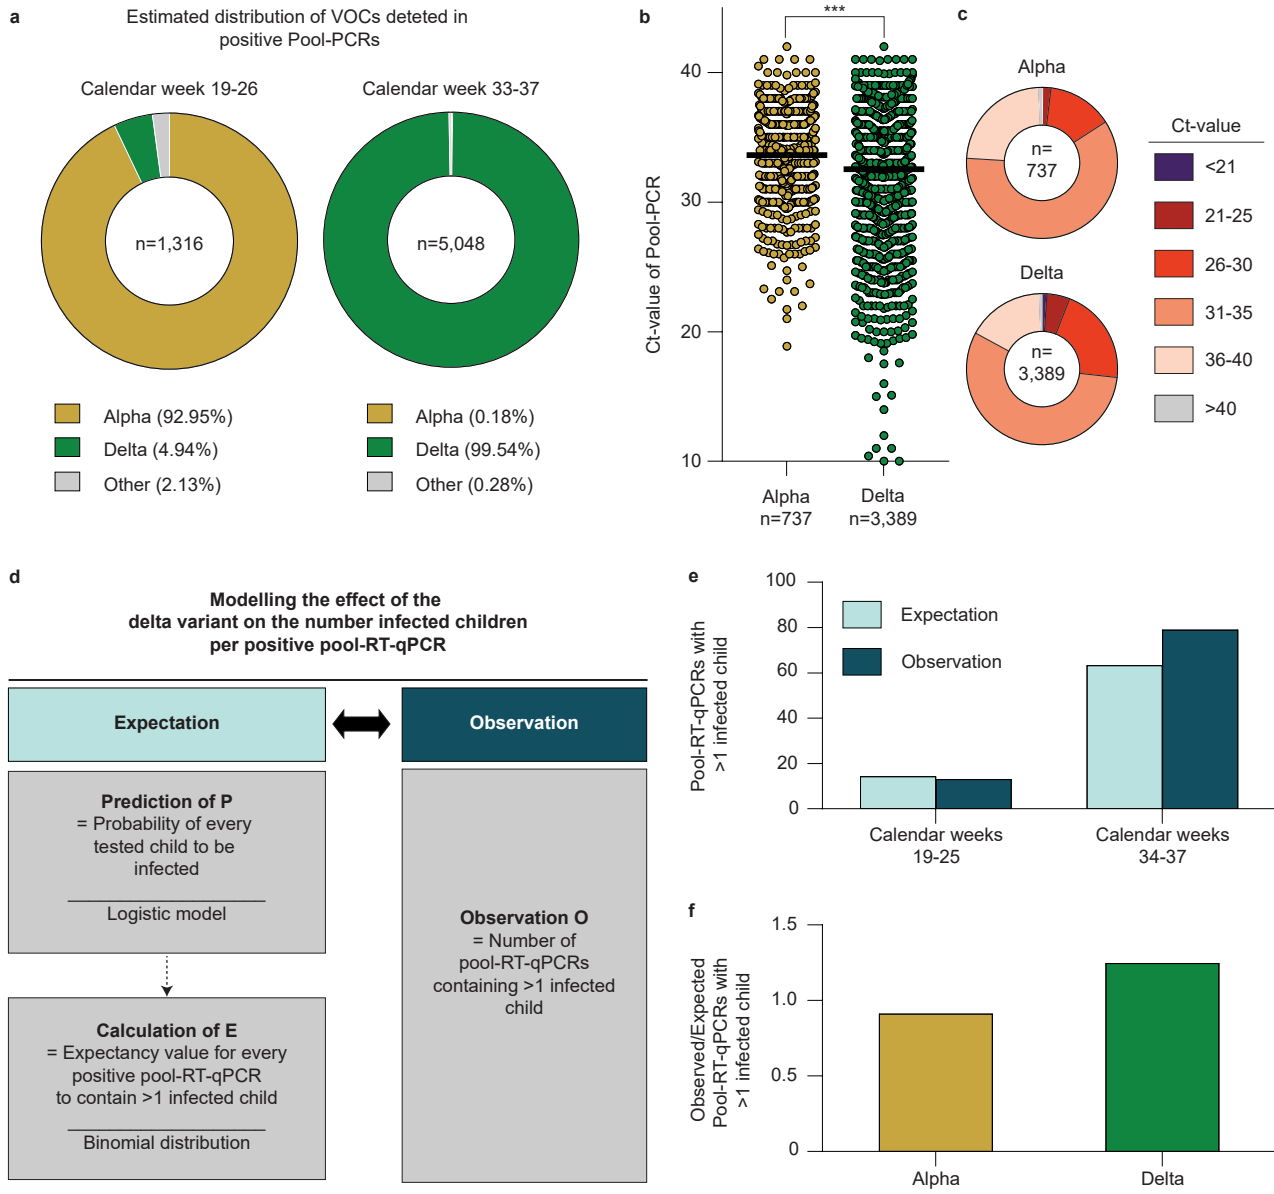

**Fig. 4: High-throughput screening reveals differences in infection dynamics for SARS-CoV-2 variants in schools**

**a**, Estimated distribution of VOCs during calendar weeks 19-26 and 33-37. VOCs are indicated by corresponding colors. **b**, All available Ct-values of positive pool-RT-qPCRs are plotted and stratified by estimated assignment to alpha (n=737 pools) or delta (n=3,389 pools) variant. Horizontal lines represent mean Ct-values, asterisks indicate the p-value (p<0.0001, two-tailed Mann-Whitney test). **c**, Categorization of Ct-values of positive Pool-RT-qPCRs assigned either alpha or delta variant in corresponding colors. **d**, Expected and observed numbers of positive pool-RT-qPCRs containing >1 infected child were compared by statistical modelling. **e**, The number of expected and observed positive pool-RT-qPCRs is stratified by time period. **f**, The ratio of expected and observed numbers of positive pool-RT-qPCRs containing >1 infected child is stratified by SARS-CoV-2 variant.

**Supplementary Information**  
**for**  
**Effective high-throughput RT-qPCR screening for SARS-CoV-2 infections in**  
**children**

**Supplementary Figures**

- Supplementary Figure 1** Cohort of acutely infected individuals
- Supplementary Figure 2** Pool-RT-qPCRs and testing areas of 12 laboratories
- Supplementary Figure 3** Data collection and plausibility checks
- Supplementary Figure 4** Turn-around time of RT-qPCRs
- Supplementary Figure 5** Implementation of the Lolli-Method in daycare facilities
- Supplementary Figure 6** Number of infected individuals in positive pool-RT-qPCRs
- Supplementary Figure 7** Determination of the SARS-CoV-2 detection rate of the Lolli-Method
- Supplementary Figure 8** Correlation between Ct-values of pool-RT-qPCR and matched single-RT-qPCRs
- Supplementary Figure 9** Modelling differences in infections dynamics of SARS-CoV-2 variants with the Lolli-Method in schools

**Supplementary Tables**

- Supplementary Table 1** SEIR-model parameter description
- Supplementary Table 2** Tested schools and students
- Supplementary Table 3** Equipment for SARS-CoV-2 screening in schools

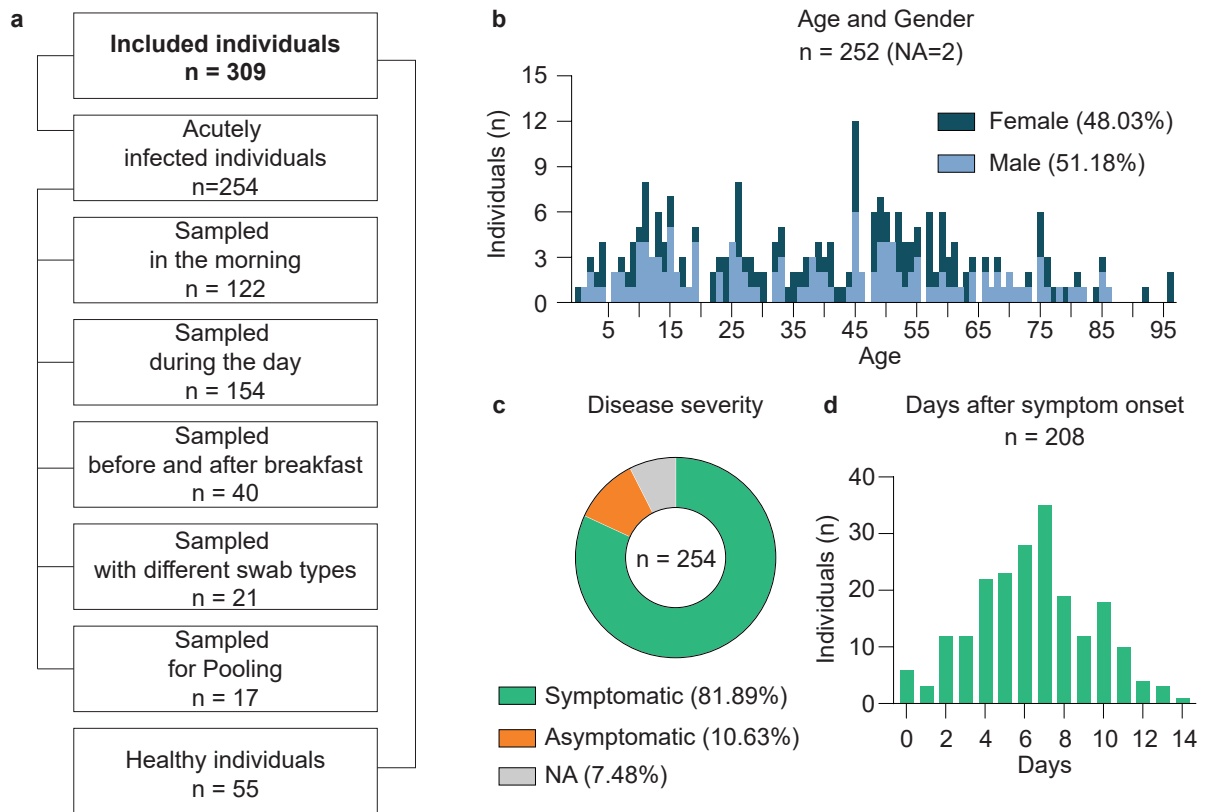

**Supplementary Fig. 1: Cohort of acutely infected individuals**

**a**, Flowchart including cohort sizes selected for RT-qPCR for the validation of the Lolli-Method. **b**, Age and gender distribution of the cohort. **c**, Disease severity among participants. **d**, Days after symptom onset among participants.



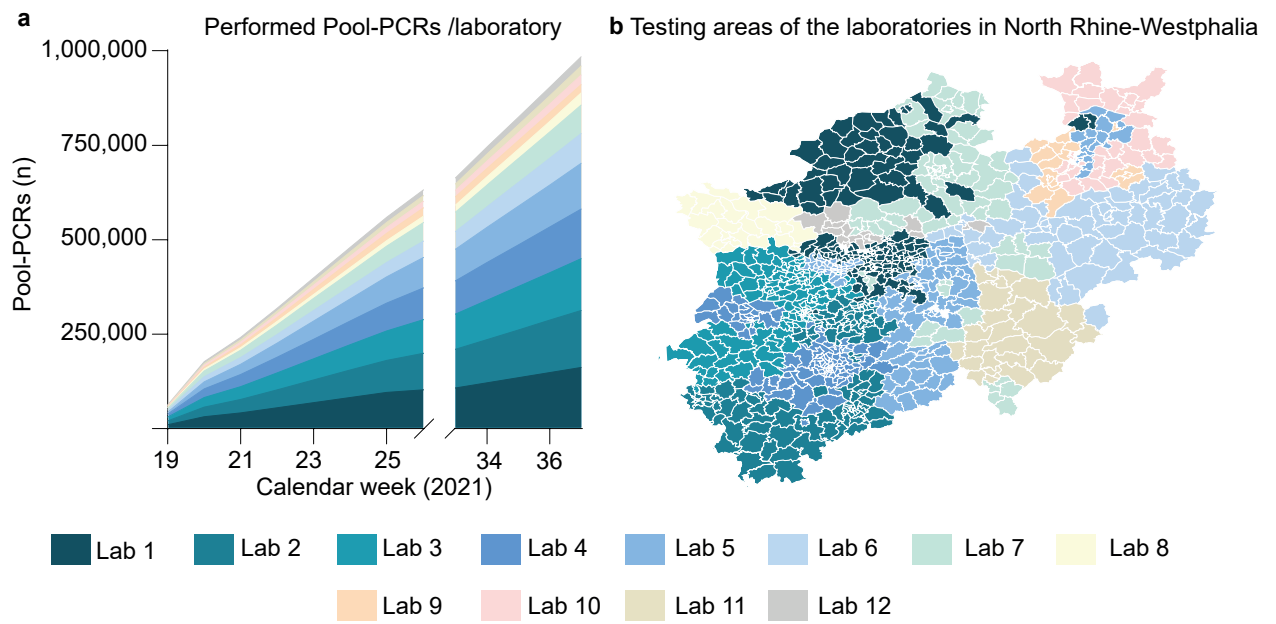

**Supplementary Fig. 2: Pool-RT-qPCRs and testing areas of 12 laboratories**

**a**, Cumulative number of performed pool-RT-qPCRs for each laboratory stratified by calendar week. **b**, Testing areas in North Rhine-Westphalia of each laboratory. Each laboratory is assigned one corresponding color.

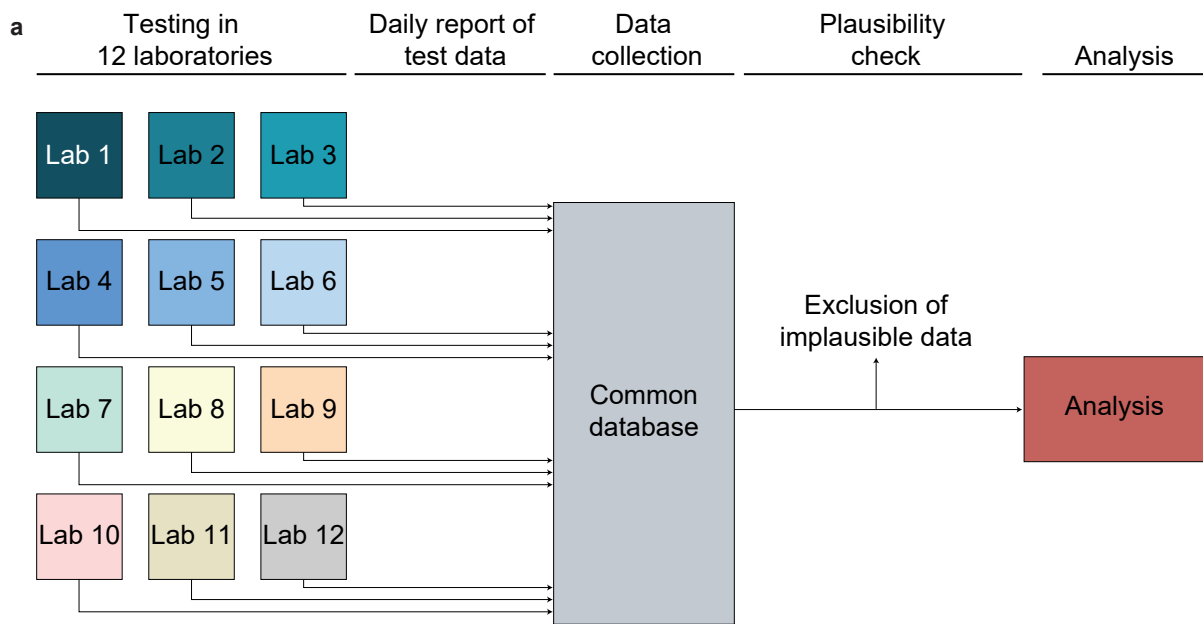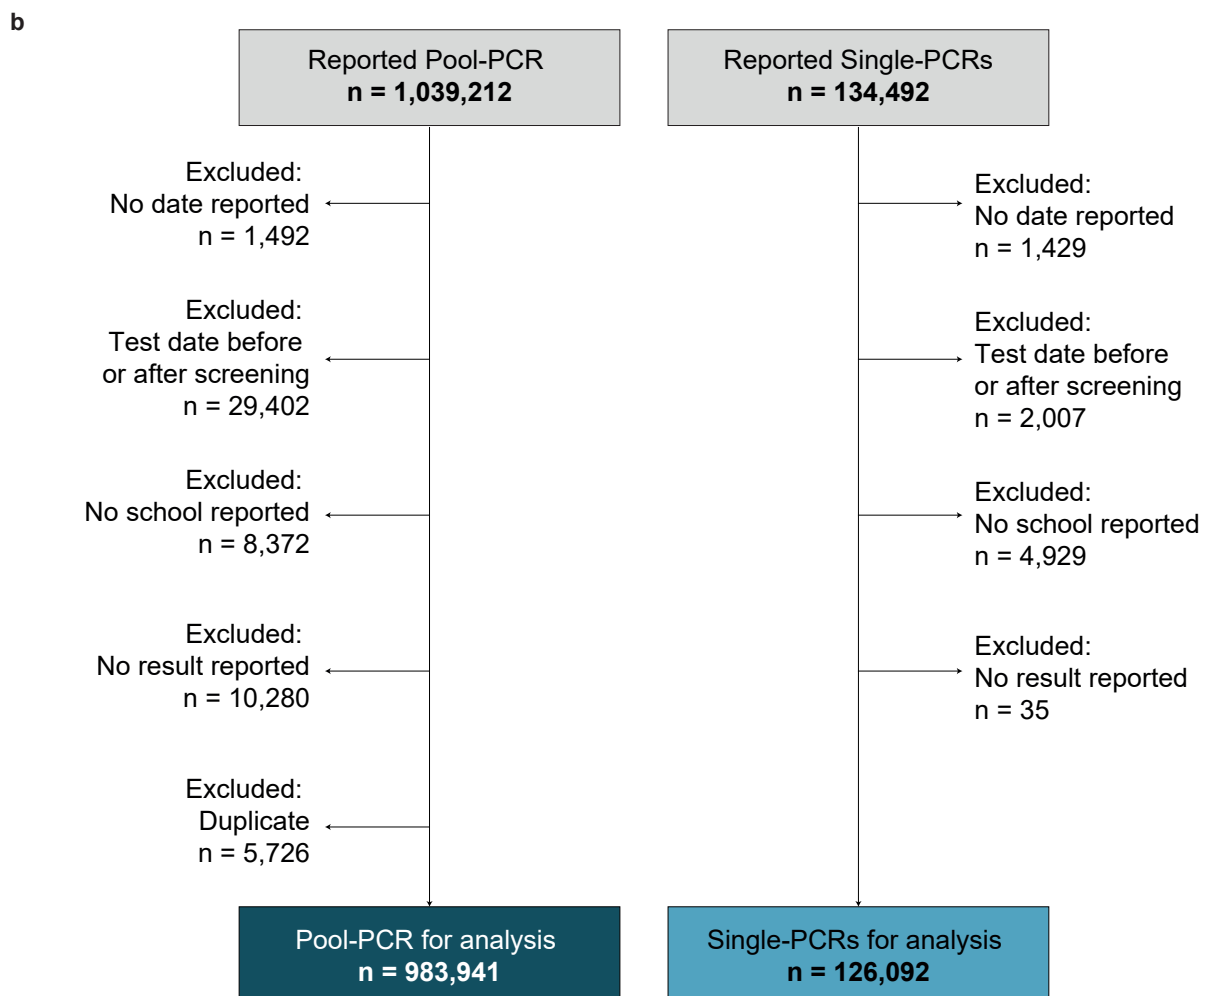

**Supplementary Fig. 3: Data collection and plausibility checks**

**a**, Flowchart including steps of data collection and quality control. **b**, Flowchart including details of data plausibility checks for RT-qPCRs indicating the numbers of RT-qPCRs that were used for analysis.

**a Time of sample registration and result communication of Pool-PCRs**

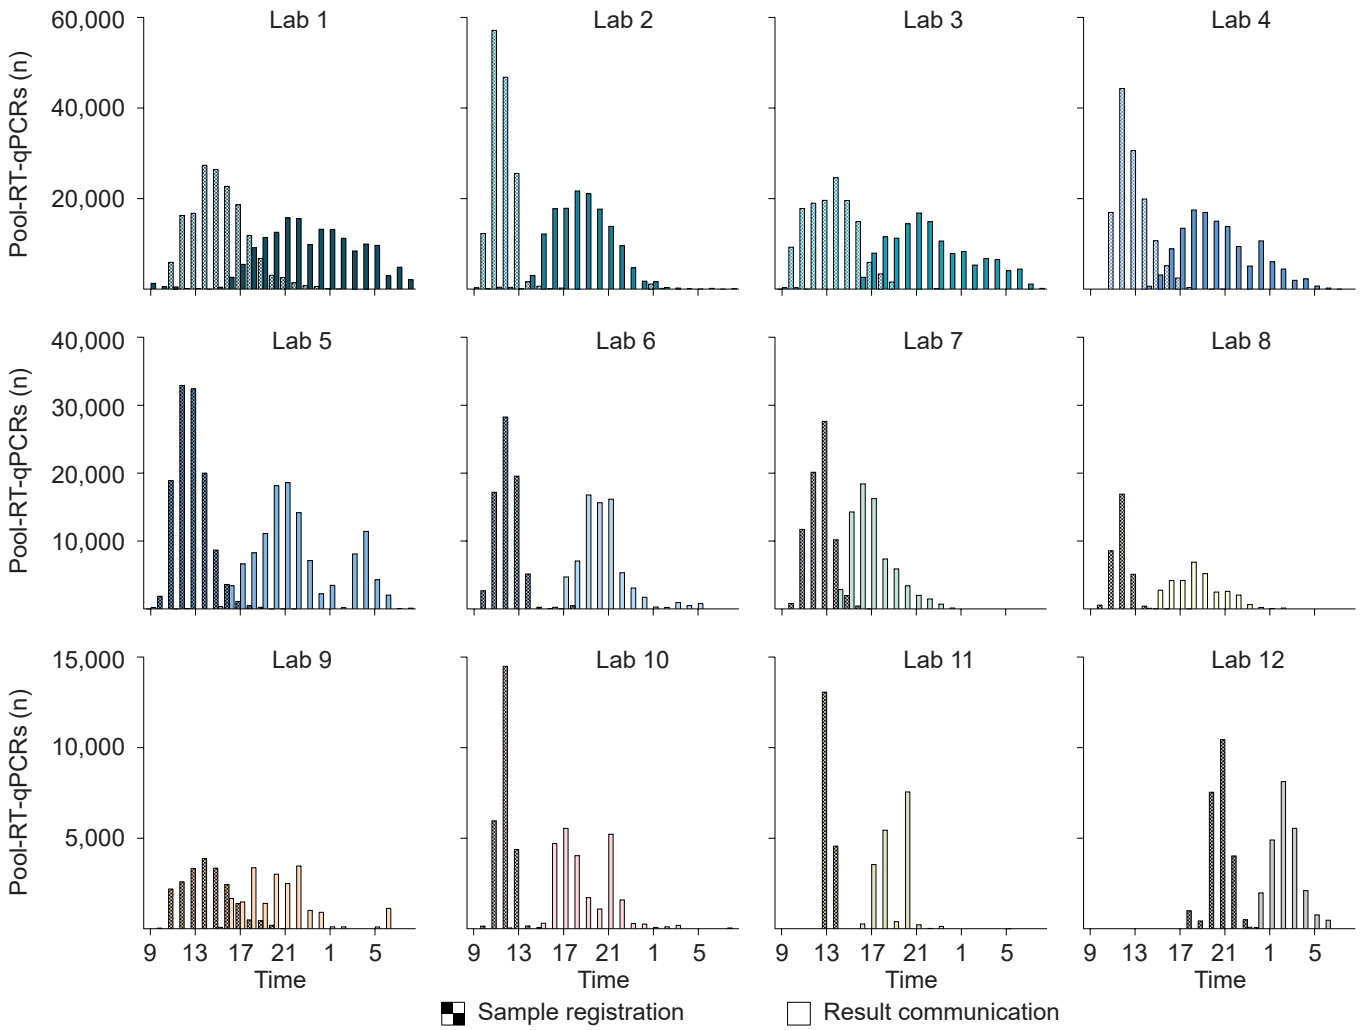

**b Turn-around time of Pool-PCRs**

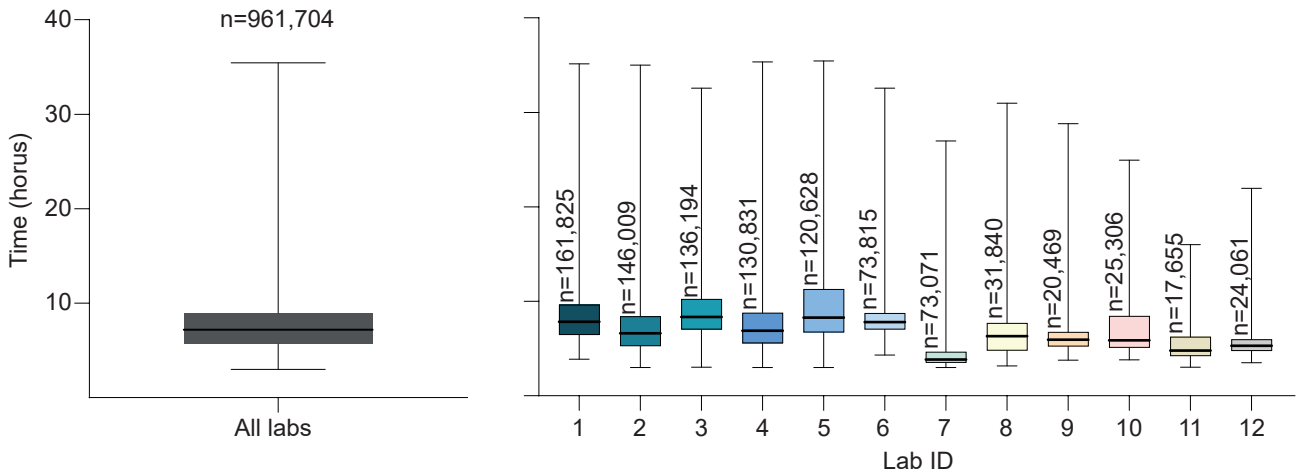

**c Time of sample registration and result communication of Single-PCRs**

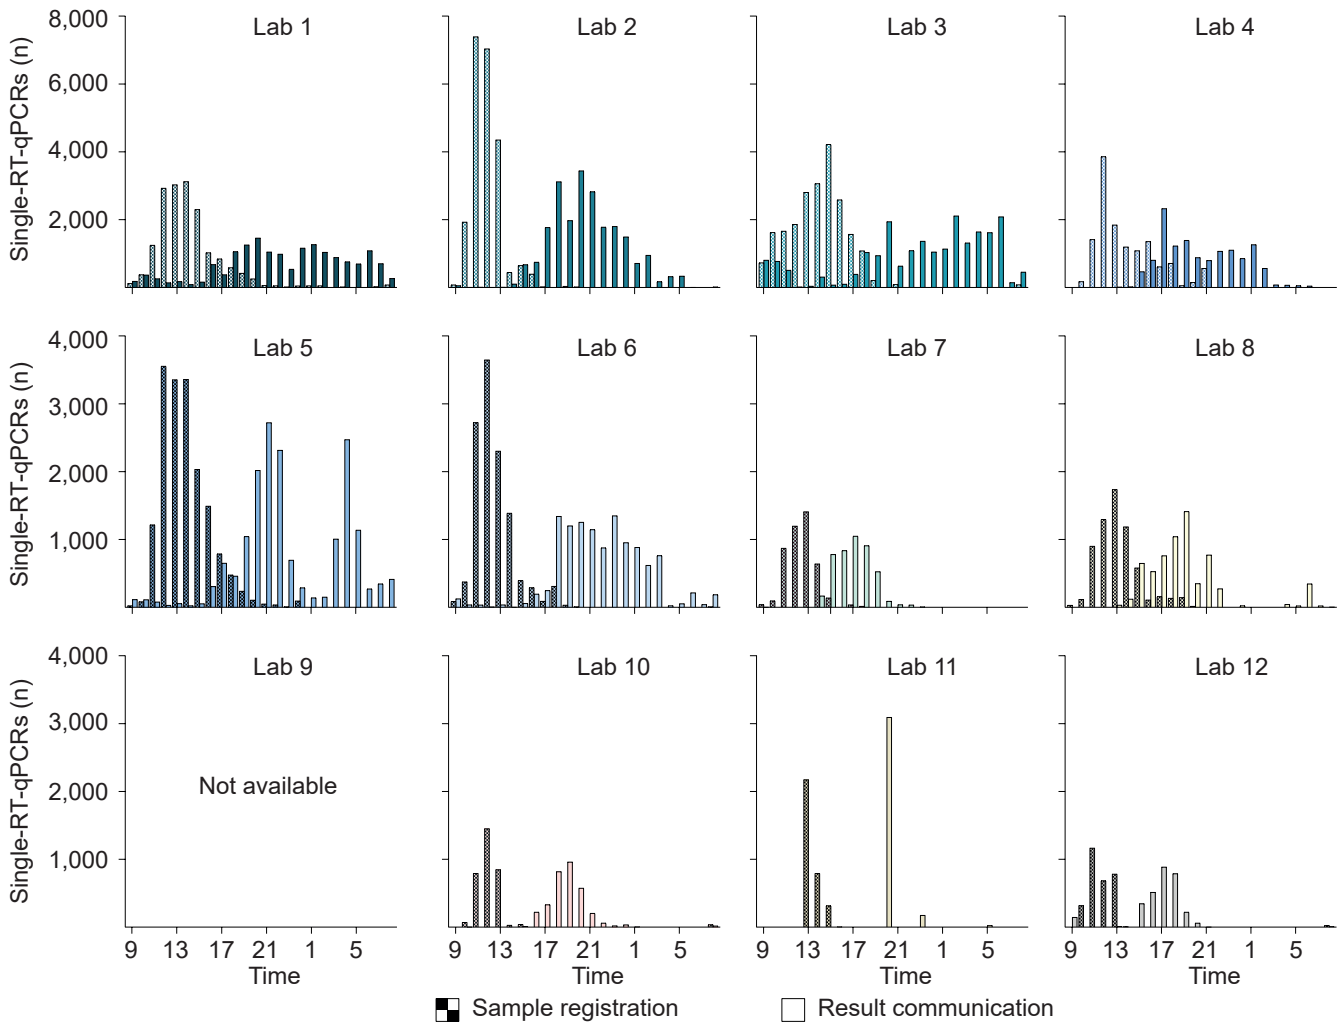

**d Turn-around time of Single-PCRs**

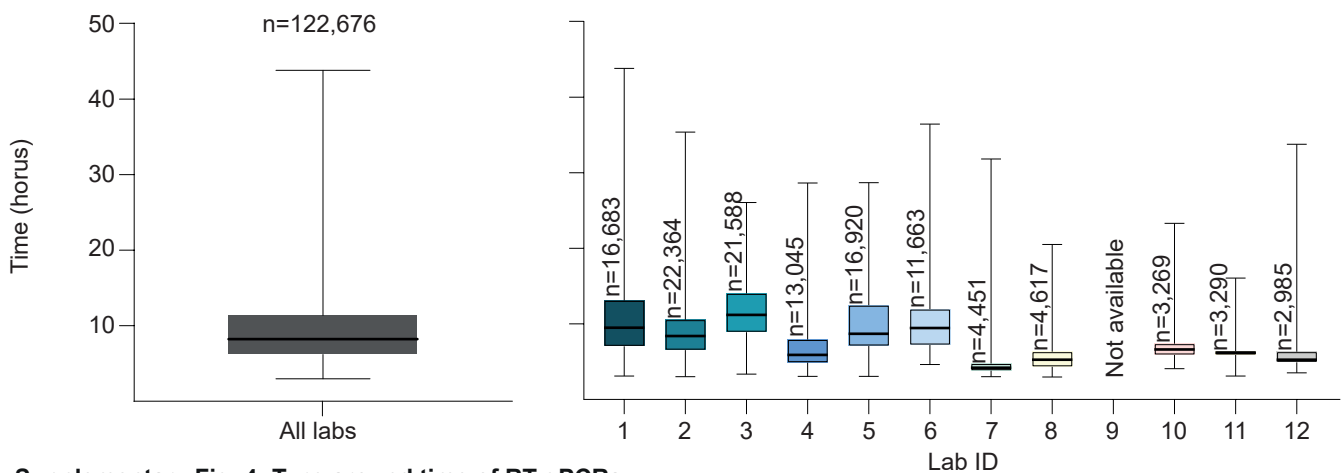

**Supplementary Fig. 4: Turn-around time of RT-qPCRs**

**a.** The bar charts represent the time of registration and result communication of pool-RT-qPCRs of each laboratory. **b.** Turn-around time of pool-RT-qPCRs (n=961,704 independent pool-RT-qPCRs). The horizontal lines in the green Box-Whisker-Plot indicate the medians, the lines at the top and at the bottom of the boxes indicate first and third quartiles and the error bars represent minimum and maximum turn-around times **c.** The bar charts represent the time of registration and result communication of single-RT-qPCRs of each laboratory. **d.** Turn-around time of single-RT-qPCRs (n=122,676 independent single-RT-qPCRs). The horizontal lines in the green Box-Whisker-Plot indicate the medians, the lines at the top and at the bottom of the boxes indicate first and third quartiles and the error bars represent minimum and maximum turn-around times.

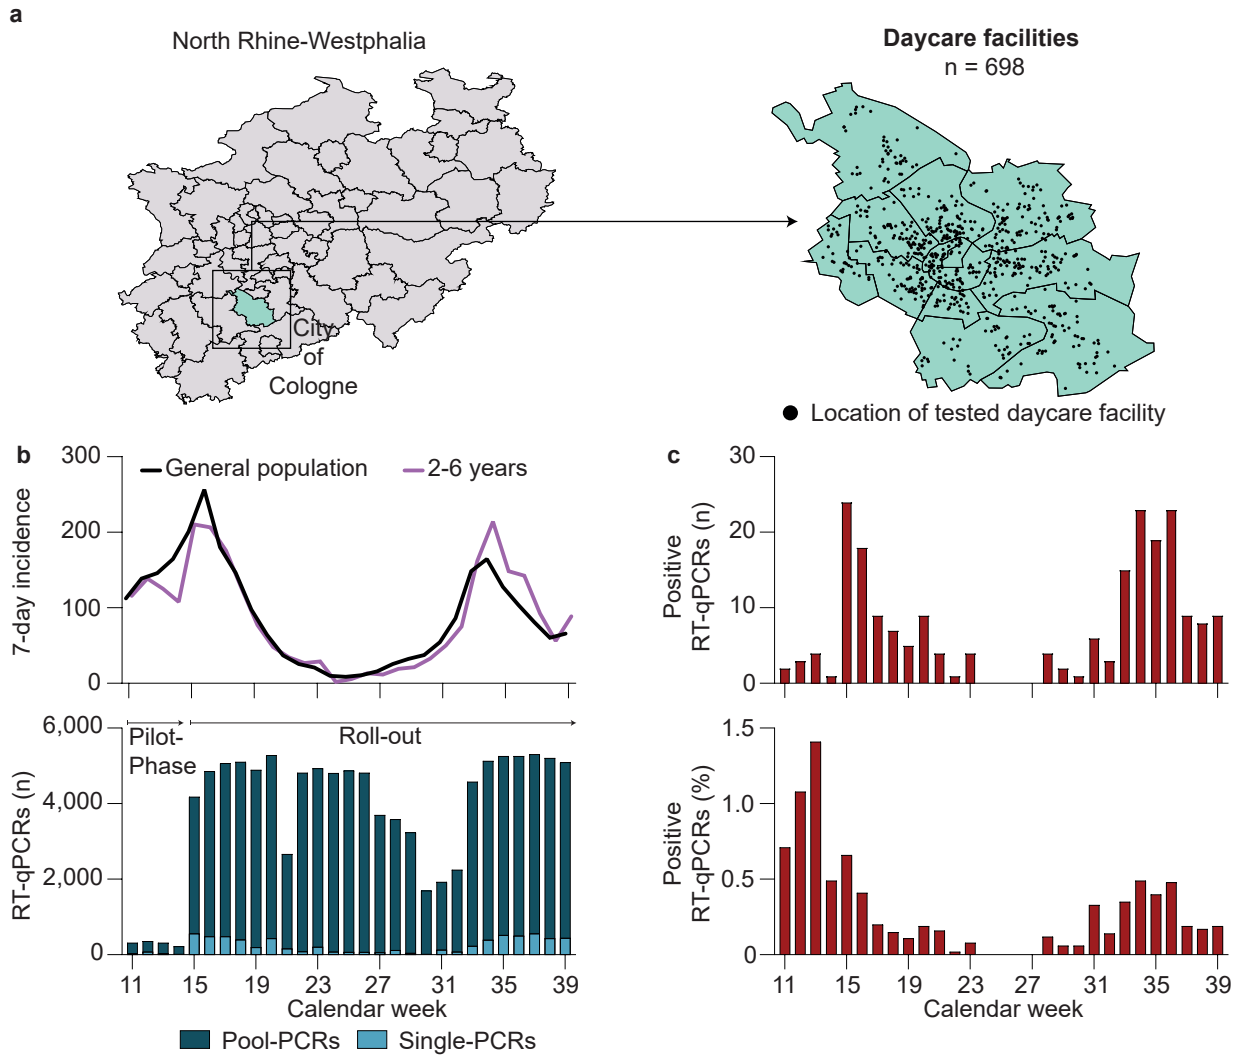

**Supplementary Fig. 5: Implementation of the Lolli-Method in daycare facilities**

**a**, Map of North Rhine-Westphalia indicating the locations of the tested daycare facilities in the city Cologne. **b**, SARS-CoV-2 7-day incidence in Cologne (top) and number of performed RT-qPCRs (bottom) stratified by calendar week. **c**, Number of positive pool-RT-qPCRs and rate of positivity of pool-RT-qPCRs stratified by calendar week.

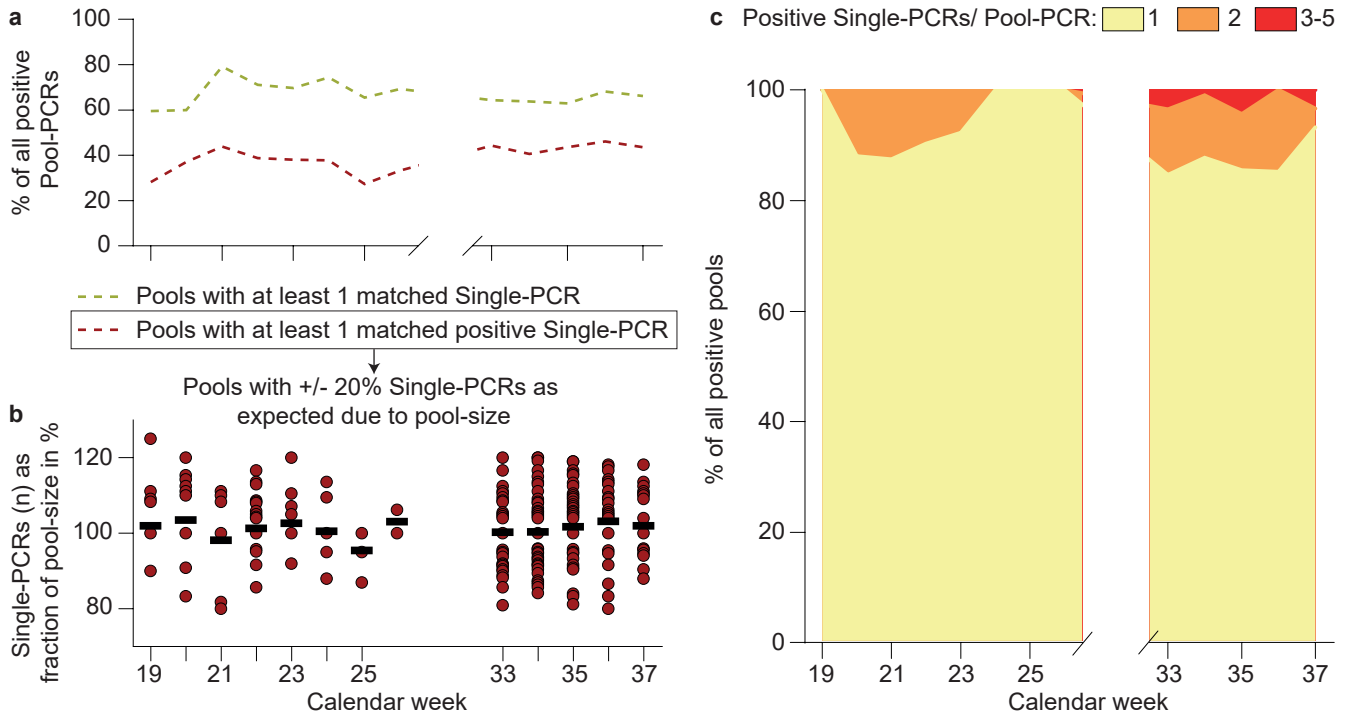

**Supplementary Fig. 6: Number of infected individuals in positive pool-RT-qPCRs**

**a**, Overview on data quality stratified by calendar week. **b**, Only pool-RT-qPCRs with at least one assigned positive single-RT-qPCR were used for further analysis. Out of those, only pool-RT-qPCRs were analyzed when the number of single-RT-qPCR was between 80 and 120% of the expected number, according to the reported pool-size (n=470 independent pool-RT-qPCRs). Horizontal lines represent the means of the fractions stratified by calendar week. **c**, Categorization of number of positive single-RT-qPCRs/positive pool-RT-qPCR stratified by calendar week.

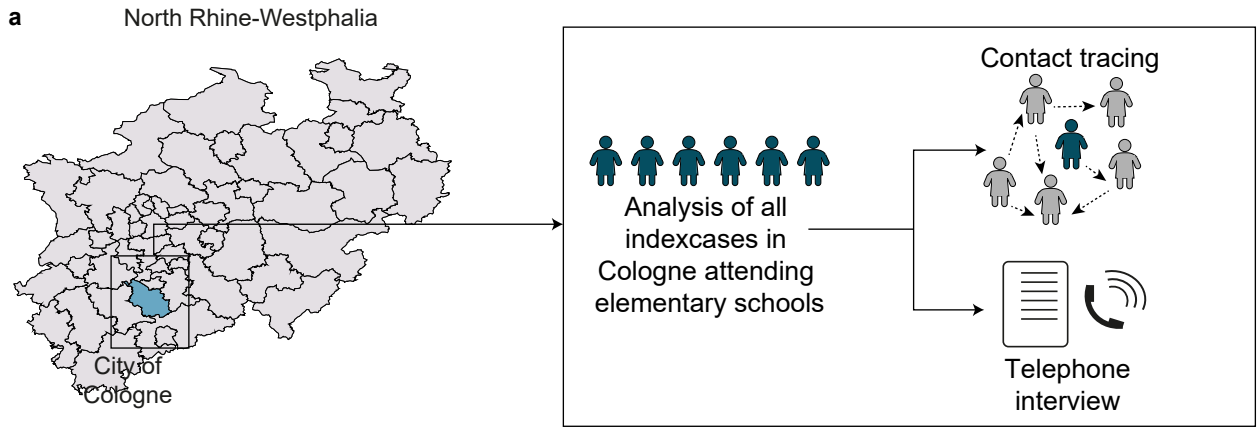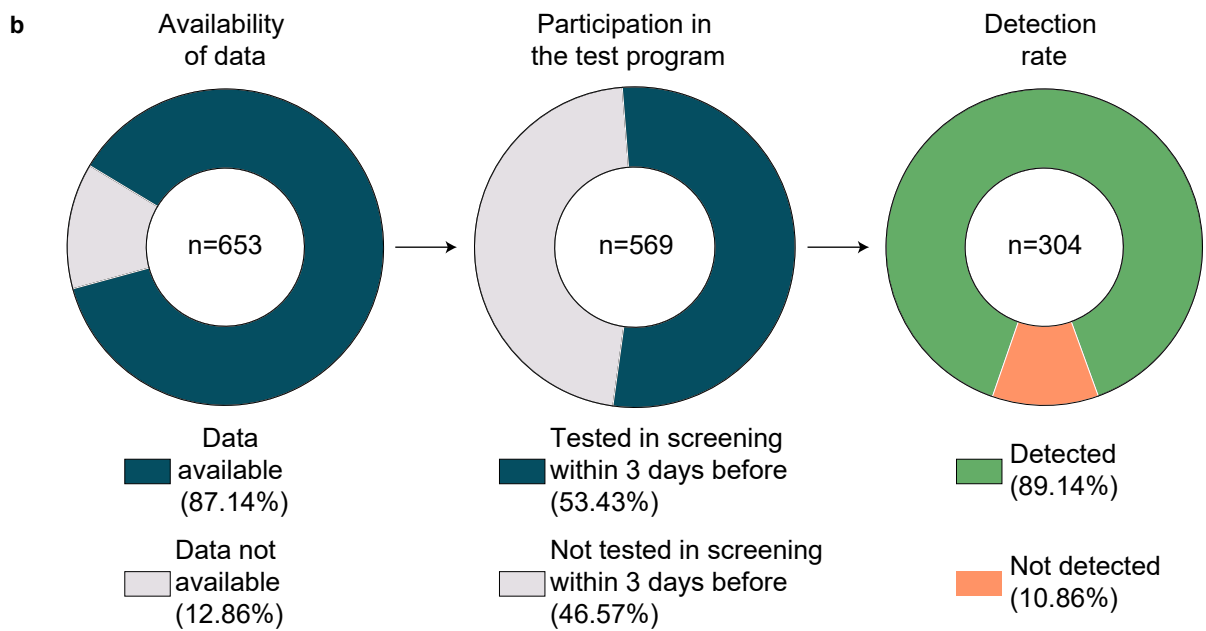

**Supplementary Fig. 7: Determination of the SARS-CoV-2 detection rate of the Lolli-Method**

**a**, Contact-tracing data of all index-cases attending elementary schools in the city of Cologne were analyzed.  
**b**, Pie-chart categorizing all index-cases attending elementary schools in Cologne.

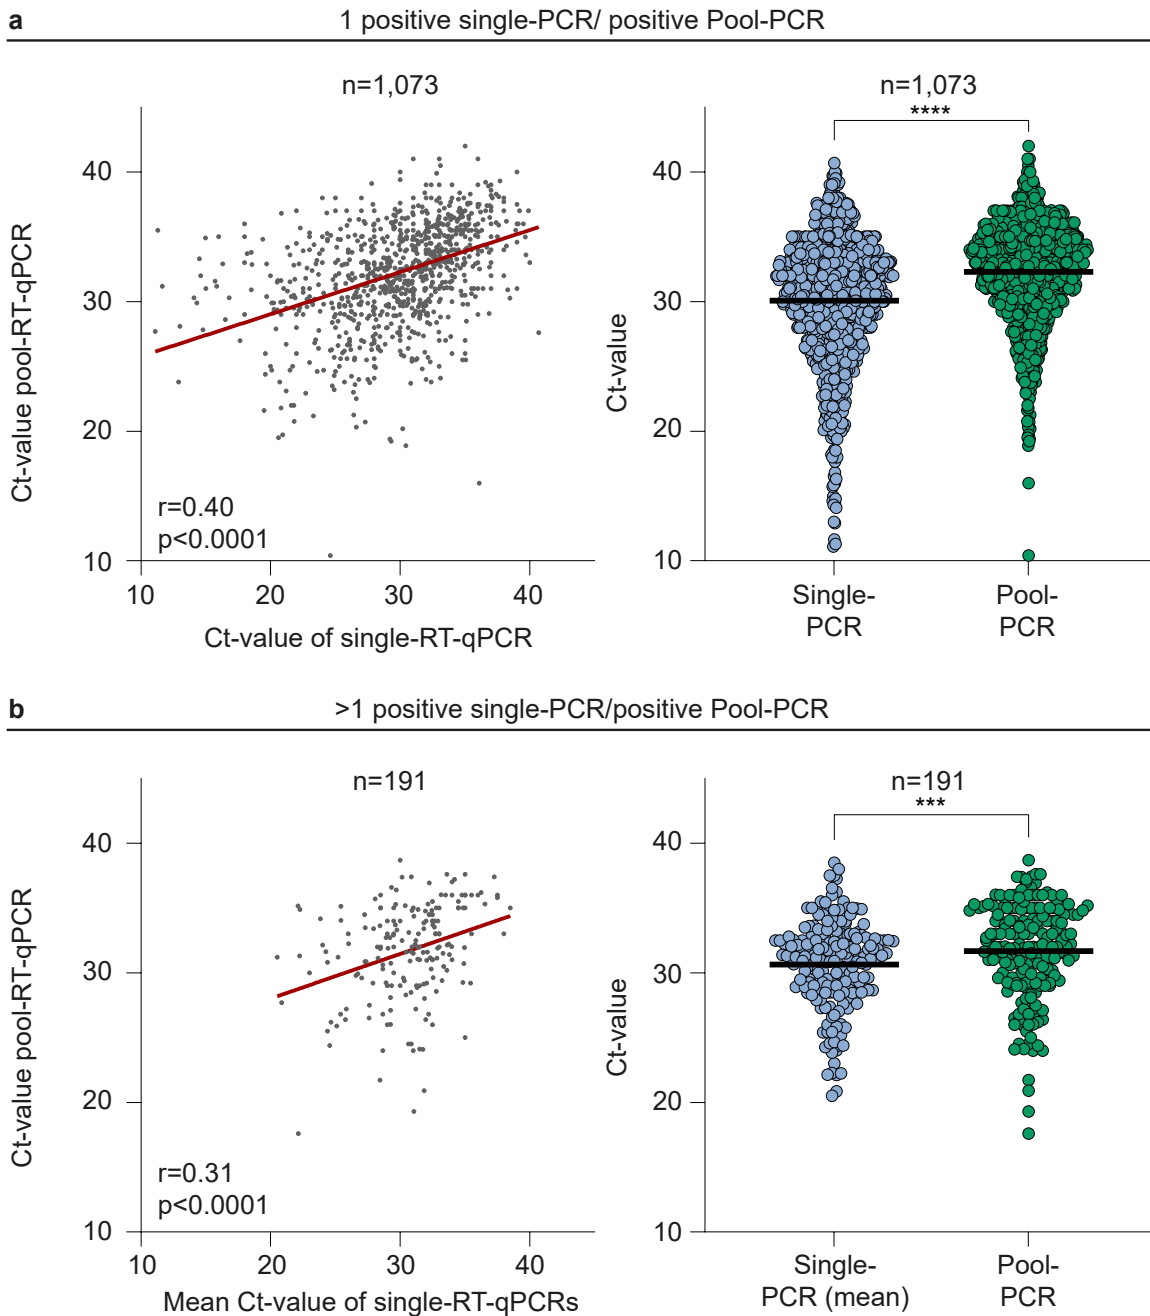

**Supplementary Fig. 8: Correlation between Ct-values of pool-RT-qPCR and matched single-RT-qPCRs.**

**a**, Left: Spearman correlation (two-tailed) of Ct-values of pool-RT-qPCRs containing only one positive single-RT-qPCR and the Ct-value of their matched single-RT-qPCR ( $n=1,073$ ;  $r=0.4$ ;  $p<0.0001$ ). Right: Single- and pool-RT-qPCRs are plotted by Ct-value. Horizontal lines indicate mean Ct-values ( $p<0.0001$ , two-tailed WSR). **b**, Left: Spearman correlation (two-tailed) of Ct-values of pool-RT-qPCRs containing more than one positive single-RT-qPCR and the mean Ct-value of their matched single-RT-qPCRs ( $n=191$ ;  $r=0.31$ ,  $p<0,0001$ ). Right: Single- and pool-RT-qPCRs are plotted by Ct-value/mean Ct-values. Horizontal lines indicate average Ct-values ( $p=0.0004$ , two-tailed WSR).



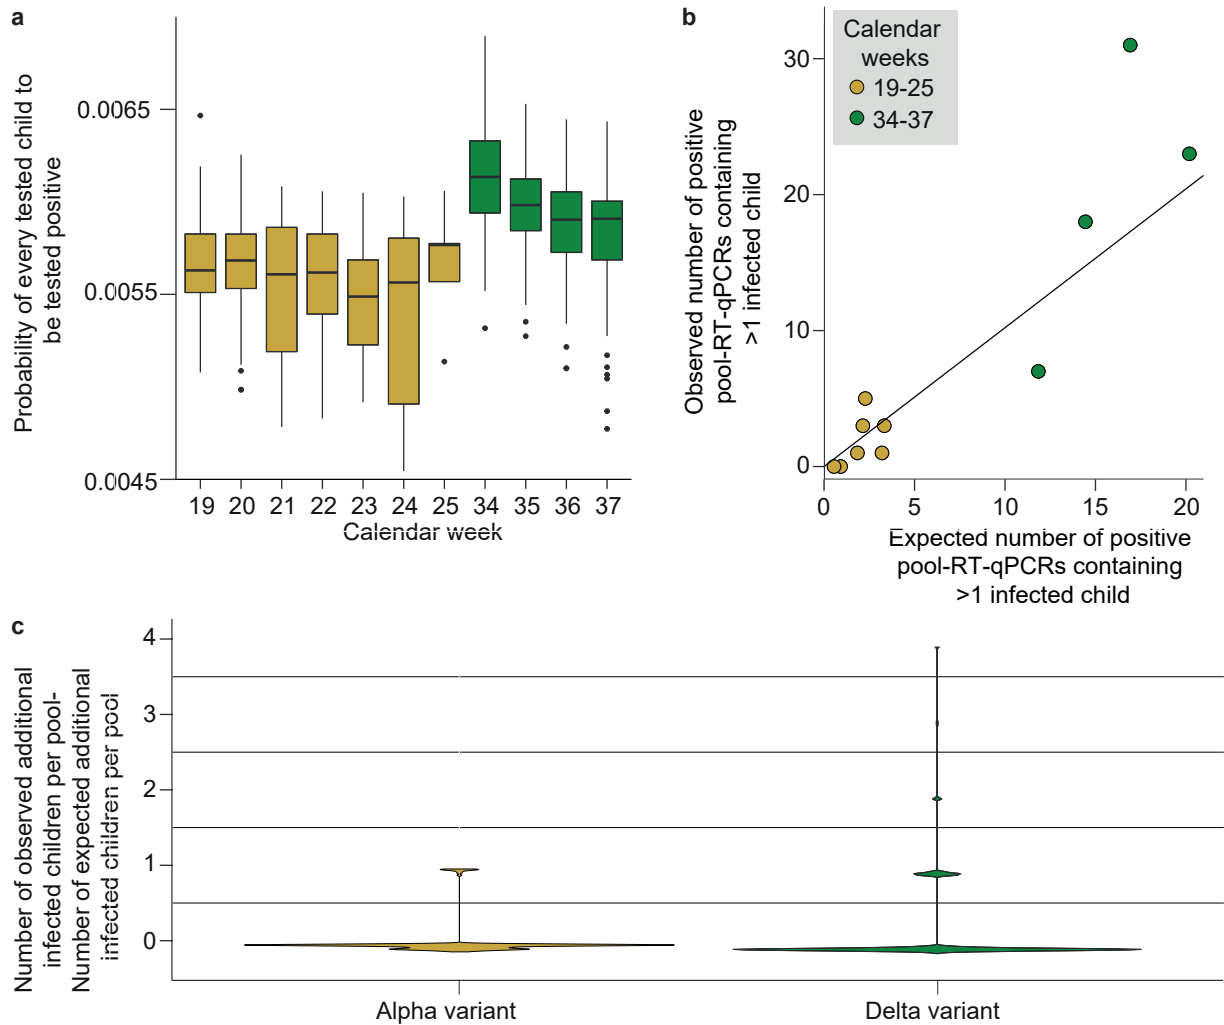

**Supplementary Fig. 9: Modelling differences in infections dynamics of SARS-CoV-2 variants with the Lolli-Method in schools**

**a**, Boxplot indicating the probability of every child to be tested positive stratified by calendar week. N=782 biologically independent positive pool-RT-qPCRs. Calendar weeks 19-25 (yellow boxes) and 34-37 (green boxes) are included in this plot. The horizontal lines indicate the medians, the lines at the top and at the bottom of the boxes indicate first and third quartiles, the vertical bars represent upper and lower whiskers and the dots represent outliers. **b**, Observed number stratified by expected number of positive pool-RT-qPCRs containing >1 infected child per calendar week. Calendar weeks 19-25 (yellow dots) and 34-37 (green dots) are included in this plot. **c**, Violin plot indicating the difference between observed and expected number of additional infected children per positive pool-RT-qPCR stratified by SARS-CoV-2 variant ( $p=0.002$ , WSR).

# Supplementary Table 1

SEIR-model parameter description

| Parameter    | Description                               | Value        | Reference  |
|--------------|-------------------------------------------|--------------|------------|
| $\tau_{pre}$ | Time between infection and infectiousness | 3 days       | 40         |
| $\tau_{inf}$ | Duration of infectiousness                | 6 days       | 41         |
| R0           | Basic reproduction number                 | 2,5          | 42         |
|              |                                           | 4,5          | 43,44      |
|              |                                           | 7,5          | 37         |
| $p_{in}$     |                                           | 0,10%        | Assumption |
|              |                                           | 0,01%        |            |
| $p_{PCR}$    | False-negative rate of RT-qPCR            | 2,00%        | 45,46,47   |
| $g$          | Exponential growth rate of viral load     | 1/(4,5 days) | 48         |

## Supplementary Table 2

Tested schools and students

| District                   | Schools (n)        |                           |               | Students (n)       |                           |               |
|----------------------------|--------------------|---------------------------|---------------|--------------------|---------------------------|---------------|
|                            | Elementary schools | Schools for special needs | Other schools | Elementary schools | Schools for special needs | Other schools |
| Aachen                     | 99                 | 22                        | 0             | 18629              | 3358                      | 0             |
| Bielefeld                  | 51                 | 13                        | 0             | 12475              | 2292                      | 0             |
| Bochum                     | 52                 | 14                        | 0             | 11584              | 3310                      | 0             |
| Bonn                       | 55                 | 8                         | 1             | 12230              | 1352                      | 416           |
| Borken                     | 74                 | 11                        | 0             | 14483              | 1598                      | 0             |
| Bottrop                    | 20                 | 3                         | 0             | 4010               | 224                       | 0             |
| Coesfeld                   | 40                 | 5                         | 0             | 8182               | 860                       | 0             |
| Dortmund                   | 91                 | 19                        | 1             | 21496              | 2868                      | 738           |
| Duisburg                   | 77                 | 15                        | 0             | 18417              | 2607                      | 0             |
| Düren                      | 55                 | 7                         | 1             | 9272               | 1385                      | 481           |
| Düsseldorf                 | 94                 | 17                        | 0             | 21777              | 3178                      | 0             |
| Ennepe-Ruhr-Kreis          | 56                 | 8                         | 1             | 10709              | 1340                      | 375           |
| Essen                      | 87                 | 22                        | 0             | 20396              | 3865                      | 0             |
| Euskirchen                 | 39                 | 9                         | 0             | 6729               | 1206                      | 0             |
| Gelsenkirchen              | 41                 | 10                        | 0             | 10411              | 1953                      | 0             |
| Gütersloh                  | 69                 | 15                        | 0             | 13840              | 1809                      | 0             |
| Hagen                      | 33                 | 6                         | 0             | 7186               | 1160                      | 0             |
| Hamm                       | 28                 | 6                         | 1             | 6682               | 797                       | 344           |
| Heinsberg                  | 55                 | 7                         | 0             | 9085               | 974                       | 0             |
| Herford                    | 51                 | 6                         | 0             | 9230               | 1046                      | 0             |
| Herne                      | 21                 | 6                         | 1             | 5593               | 656                       | 1065          |
| Hochsauerlandkreis         | 64                 | 12                        | 0             | 8756               | 1038                      | 0             |
| Höxter                     | 25                 | 6                         | 0             | 4841               | 621                       | 0             |
| Kleve                      | 58                 | 11                        | 0             | 11105              | 1513                      | 0             |
| Krefeld                    | 34                 | 8                         | 1             | 7955               | 1459                      | 487           |
| Köln                       | 159                | 28                        | 0             | 38152              | 4844                      | 0             |
| Leverkusen                 | 25                 | 4                         | 0             | 6457               | 399                       | 0             |
| Lippe                      | 66                 | 13                        | 0             | 13229              | 1850                      | 0             |
| Mettmann                   | 83                 | 14                        | 0             | 17856              | 1841                      | 0             |
| Minden-Lübbecke            | 64                 | 14                        | 2             | 11554              | 1477                      | 998           |
| Märkischer Kreis           | 70                 | 11                        | 1             | 14360              | 1822                      | 518           |
| Mönchengladbach            | 43                 | 12                        | 0             | 9408               | 1680                      | 0             |
| Mülheim an der Ruhr        | 24                 | 4                         | 0             | 6100               | 1067                      | 0             |
| Münster                    | 47                 | 8                         | 2             | 9956               | 1798                      | 516           |
| Oberbergischer Kreis       | 51                 | 11                        | 0             | 10204              | 1783                      | 0             |
| Oberhausen                 | 31                 | 5                         | 0             | 7202               | 715                       | 0             |
| Olpe                       | 35                 | 7                         | 0             | 4885               | 1022                      | 0             |
| Paderborn                  | 64                 | 10                        | 0             | 11768              | 1834                      | 0             |
| Recklinghausen             | 99                 | 20                        | 0             | 21906              | 3170                      | 0             |
| Remscheid                  | 21                 | 6                         | 0             | 3976               | 509                       | 0             |
| Rhein-Erft-Kreis           | 78                 | 15                        | 0             | 17877              | 2135                      | 0             |
| Rhein-Kreis Neuss          | 79                 | 9                         | 0             | 17238              | 1400                      | 0             |
| Rhein-Sieg-Kreis           | 102                | 24                        | 0             | 22715              | 3137                      | 0             |
| Rheinisch-Bergischer Kreis | 56                 | 8                         | 0             | 10376              | 1165                      | 0             |
| Siegen-Wittgenstein        | 62                 | 8                         | 1             | 9868               | 875                       | 333           |
| Soest                      | 58                 | 13                        | 1             | 10648              | 1862                      | 280           |
| Solingen                   | 27                 | 6                         | 0             | 5608               | 622                       | 0             |
| Steinfurt                  | 89                 | 17                        | 1             | 16816              | 2154                      | 103           |
| Unna                       | 63                 | 8                         | 0             | 13860              | 1211                      | 0             |
| Viersen                    | 48                 | 8                         | 1             | 10105              | 966                       | 336           |
| Warendorf                  | 58                 | 5                         | 0             | 10431              | 768                       | 0             |
| Wesel                      | 77                 | 12                        | 0             | 15722              | 2525                      | 0             |
| Wuppertal                  | 57                 | 11                        | 2             | 13085              | 1558                      | 688           |
| <b>Total</b>               | <b>3105</b>        | <b>577</b>                | <b>18</b>     | <b>646435</b>      | <b>88658</b>              | <b>7678</b>   |

## Supplementary Table 3

Equipment for SARS-CoV-2 screening in schools

| Lab ID | RNA extraction                                                                                                             | RT-qPCR equipment                                                                                                                                      |
|--------|----------------------------------------------------------------------------------------------------------------------------|--------------------------------------------------------------------------------------------------------------------------------------------------------|
| 1      | 1. Echolution Viral RNA/DNA Swab Kit (Bio Echo Life Science GmbH)                                                          | 1. 2019-nCoV: RT-PCR Kit (BGI)<br>2. ABI 7500 / ABI 7500-fast / ABI 7300 (Applied Biosystems)                                                          |
| 2      | 1. KingFisher Flex (ThermoFisher)<br>2. Tecan Freedom EVO-2 100 Base (Tecan)<br>3. Quick-DNA/RNA Viral MagBead (Zymo)      | 1. ViroQ Rapid SARS-CoV-2 (BAG Diagnostics)<br>2. CFX96 (BioRad)                                                                                       |
| 3      | Not available                                                                                                              | 1. LightCycler® 480 II (Roche Diagnostics)                                                                                                             |
| 4      | 1. Chemagen 360 (Perkin Elmer)                                                                                             | 1. Cobas 480 Z II (Roche Diagnostics)<br>2. QuantStudio 5 (ThermoFisher)<br>3. QuantStudio 7pro (ThermoFisher)                                         |
| 5      | 1. Chemagen 360 (Perkin Elmer)                                                                                             | 1. Hologic Panther Aptima Sars Co-V-2 Assay (Hologic)<br>2. Thermo TaqPath Covid-19 Kit (ThermoFisher)<br>3. CFX 96 (BioRad)<br>4. CFX 384 (BioRad)    |
| 6      | 1. KingFisher (ThermoFisher)                                                                                               | 1. Allplex™ SARS-CoV-2 Master Assay (Seegene)                                                                                                          |
| 7      | 1. KingFisher Flex (FA ThermoFisher)<br>2. Maelstrom 9600 (Tanbead)<br>3. RNA Extraction Kit AE1 (GSD NovaPrime®)          | 1. AriaDx (Agilent Technologies)<br>2. ABI 7500 FAST (FA ThermoFisher)<br>3. SARS-CoV-2 RT-PCR (GSD NovaPrime®)                                        |
| 8      | 1. Roche SARS-CoV-2 KIT (Roche Diagnostics)<br>2. AltoStar AM 16 (Altona Diganostics)                                      | 1. Cobas 6800 (Roche Diagnostics)<br>2. CFX 96 (BioRad)                                                                                                |
| 9      | Not available                                                                                                              | Not available                                                                                                                                          |
| 10     | 1. Maelstrom 9600 (TanBead)                                                                                                | 1. Allplex™ SARS-CoV-2 Master Assay (Seegene)                                                                                                          |
| 11     | 1. RoboPrep 96 (Bioteccon Diagnostics)                                                                                     | 1. CFX DX (BioRad)<br>2. LightCycler® 480 II (Roche Diagnostics)                                                                                       |
| 12     | 1. Roche SARS-CoV-2 KIT (Roche Diagnostics)<br>2. KingFisher Flex (ThermoFisher)<br>3. ExtraStar 1.0, (Altona Diganostics) | 1. Cobas 6800 (Roche Diagnostics)<br>2. Cobas 8800 (Roche Diagnostics)<br>3. CFX96 (BioRad)<br>4. RealStar SARS-CoV-2 RT-PCR Kit, (Altona Diganostics) |

## **Description of additional Supplementary Files**

File Name: Supplementary Data 1

Description: Validation of the Lolli Method (Morning and during the day)

File Name: Supplementary Data 2

Description: Validation of the Lolli Method (Before and 1 hour after breakfast)

File Name: Supplementary Data 3

Description: Validation of the Lolli Method (Different swab-types)

File Name: Supplementary Data 4

Description: Validation of the Lolli Method (Pooling)

File Name: Supplementary Data 5

Description: Validation of the Lolli Method (Specificity)

File Name: Supplementary Data 6

Description: Overview on SARS-CoV-2 screening in schools

File Name: Supplementary Data 7

Description: Code of the SEIR-model

File Name: Supplementary Data 8

Description: Code of the statistical modelling
