# Supplementary material for: Effective high-throughput RT-qPCR screening for SARS-CoV-2 infections in children
Source: bioRxiv or medRxiv preprint supplement (doi:10.1101/2022.02.04.22270304), 2022-06-06
Supplement: Supplementary file [file media-1.pdf]

## Supplemental Table 1

| Lab ID | RNA extraction                                                                                                             | RT-qPCR equipment                                                                                                                                      |
|--------|----------------------------------------------------------------------------------------------------------------------------|--------------------------------------------------------------------------------------------------------------------------------------------------------|
| 1      | 1. Echolution Viral RNA/DNA Swab Kit (Bio Echo Life Science GmbH)                                                          | 1. 2019-nCoV: RT-PCR Kit (BGI)<br>2. ABI 7500 / ABI 7500-fast / ABI 7300 (Applied Biosystems)                                                          |
| 2      | 1. KingFisher Flex (ThermoFisher)<br>2. Tecan Freedom EVO-2 100 Base (Tecan)<br>3. Quick-DNA/RNA Viral MagBead (Zymo)      | 1. ViroQ Rapid SARS-CoV-2 (BAG Diagnostics)<br>2. CFX96 (BioRad)                                                                                       |
| 3      | Not available                                                                                                              | 1. LightCycler® 480 II (Roche Diagnostics)                                                                                                             |
| 4      | 1. Chemagen 360 (Perkin Elmer)                                                                                             | 1. Cobas 480 Z II (Roche Diagnostics)<br>2. QuantStudio 5 (ThermoFisher)<br>3. QuantStudio 7pro (ThermoFisher)                                         |
| 5      | 1. Chemagen 360 (Perkin Elmer)                                                                                             | 1. Hologic Panther Aptima Sars Co-V-2 Assay (Hologic)<br>2. Thermo TaqPath Covid-19 Kit (ThermoFisher)<br>3. CFX 96 (BioRad)<br>4. CFX 384 (BioRad)    |
| 6      | 1. KingFisher (ThermoFisher)                                                                                               | 1. Allplex™ SARS-CoV-2 Master Assay (Seegene)                                                                                                          |
| 7      | 1. KingFisher Flex (FA ThermoFisher)<br>2. Maelstrom 9600 (Tanbead)<br>3. RNA Extraction Kit AE1 (GSD NovaPrime®)          | 1. AriaDx (Agilent Technologies)<br>2. ABI 7500 FAST (FA ThermoFisher)<br>3. SARS-CoV-2 RT-PCR (GSD NovaPrime®)                                        |
| 8      | 1. Roche SARS-CoV-2 KIT (Roche Diagnostics)<br>2. AltoStar AM 16 (Altona Diganostics)                                      | 1. Cobas 6800 (Roche Diagnostics)<br>2. CFX 96 (BioRad)                                                                                                |
| 9      | Not available                                                                                                              | Not available                                                                                                                                          |
| 10     | 1. Maelstrom 9600 (TanBead)                                                                                                | 1. Allplex™ SARS-CoV-2 Master Assay (Seegene)                                                                                                          |
| 11     | 1. RoboPrep 96 (Bioteccon Diagnostics)                                                                                     | 1. CFX DX (BioRad)<br>2. LightCycler® 480 II (Roche Diagnostics)                                                                                       |
| 12     | 1. Roche SARS-CoV-2 KIT (Roche Diagnostics)<br>2. KingFisher Flex (ThermoFisher)<br>3. ExtraStar 1.0, (Altona Diganostics) | 1. Cobas 6800 (Roche Diagnostics)<br>2. Cobas 8800 (Roche Diagnostics)<br>3. CFX96 (BioRad)<br>4. RealStar SARS-CoV-2 RT-PCR Kit, (Altona Diganostics) |
